# Supplementary material for: A simple construction of multiple highly-efficient orange-emitting carboranes based on interlocked molecular aggregations
Source: Royal Society of Chemistry journal article supplement (doi:10.1039/d1qm01567b), 2022-01-01
Supplement: d1qm01567b1.pdf [file d1qm01567b1.pdf]

## Supporting Information

### A simple construction of multiple highly-efficient orange-emitting carboranes based on interlocked molecular aggregations

Zhaojin Wang,<sup>\*a</sup> Bo Chen,<sup>a</sup> Huike Zhang,<sup>a</sup> Haoyu Yang,<sup>b</sup> Silu Tao<sup>\*b</sup> and Rongfeng Guan<sup>\*a</sup>

Key Laboratory for Advanced Technology in Environmental Protection of Jiangsu Province, Yancheng Institute of Technology, Yancheng, Jiangsu Province, P.R. China

School of Optoelectronic Science and Engineering, University of Electronic Science and Technology of China (UESTC), Chengdu 610054, P.R. China

#### Table of contents

**Figure S1-S8.** The NMR spectra.

**Figure S9.** High Resolution Mass Spectra (HRMS).

**Figure S10.** An analysis of intermolecular interactions and vibrations along carboranyl C–C bonds in the two crystals.

**Table S1.** Crystallographic data of **CB-Cz** and **CB-CF<sub>3</sub>**.

**Figure S11.** PL appearance of **CB-H** in different ratios of THF/water and PL efficiency evaluation of **CB-H** aggregates in THF/water.

**Figure S12.** Evaluations of quantum efficiencies and PL decay curves of the carboranes.

**Figure S13.** Optimized structures and electronic transitions of the derived carboranes.

**Figure S14.** Different views of the selected cluster from **CB-CF<sub>3</sub>** crystal for the ONIOM modelling.

**Figure S15.** Atomic force microscopy of the vapor-deposited film of **CB-Bu**.

**Table S2.** Coordinates of the optimized structures of free carboranes in the ground and first excited states.

**Table S3.** Coordinates of the optimized  $S_1$  structure of **CB-CF<sub>3</sub>** in the ONIOM model.

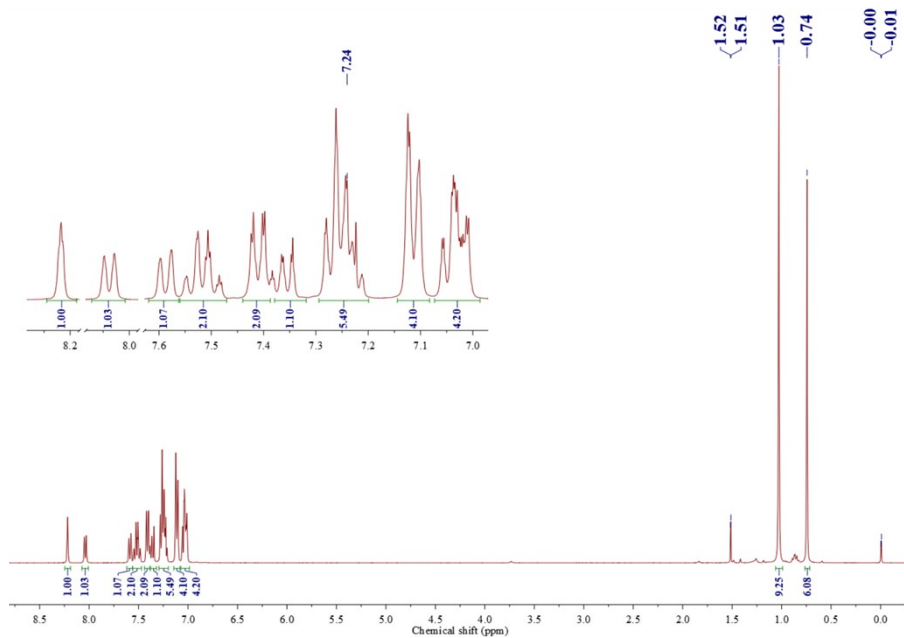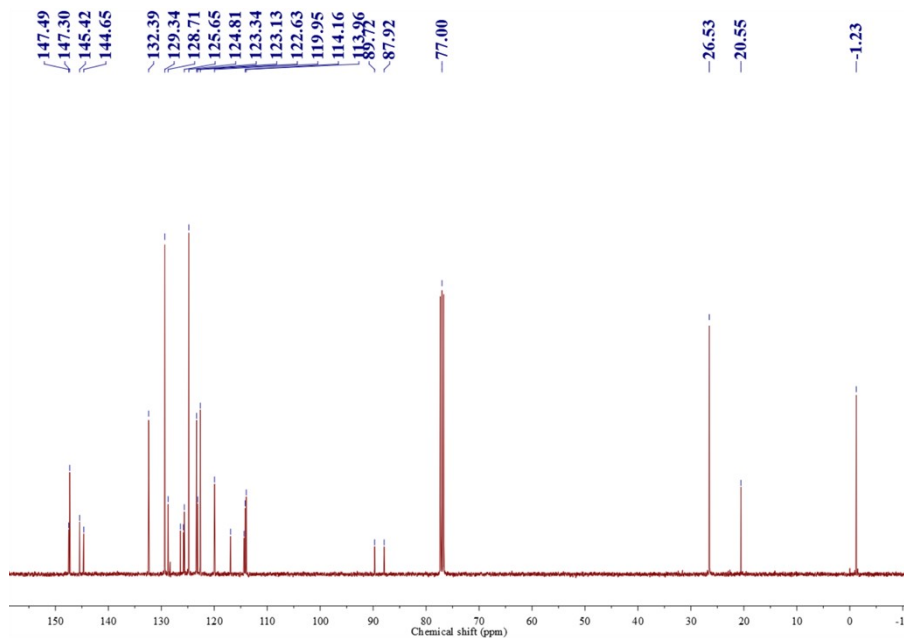

**Figure S1.**  $^1\text{H}$  and  $^{13}\text{C}$  NMR spectra of TPA-C $\equiv$ C-CzSi.

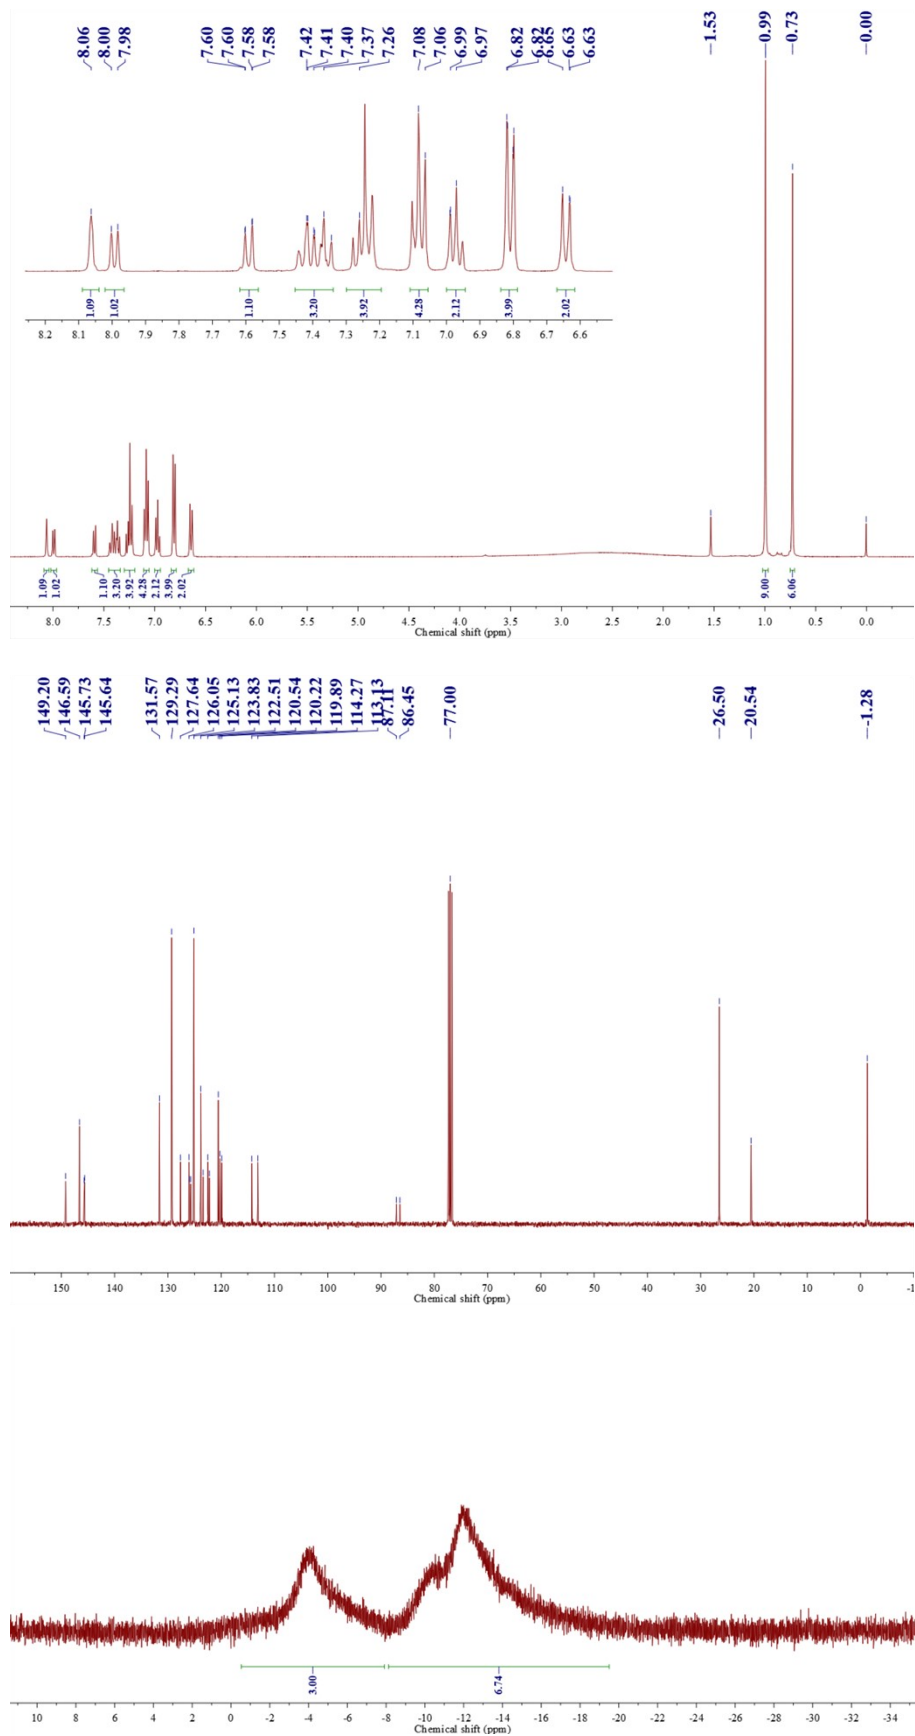

Figure S2.  $^1\text{H}$ ,  $^{13}\text{C}$  and  $^{11}\text{B}$  NMR spectra of CB-Si.

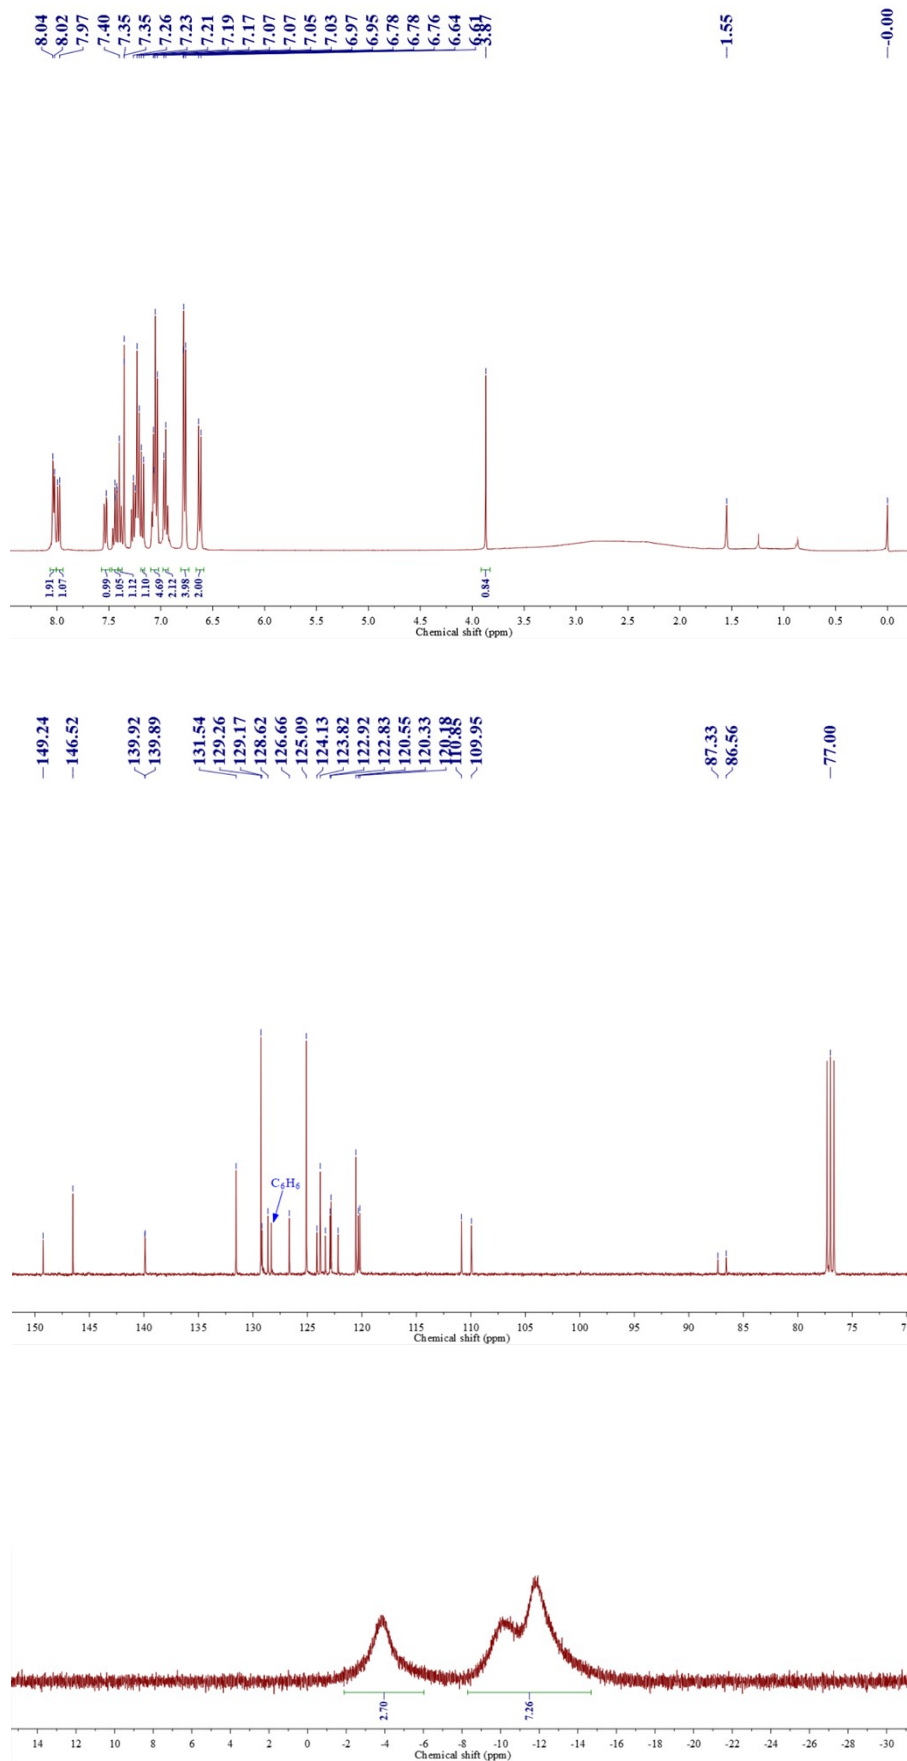

Figure S3.  $^1\text{H}$ ,  $^{13}\text{C}$  and  $^{11}\text{B}$  NMR spectra of CB-H.

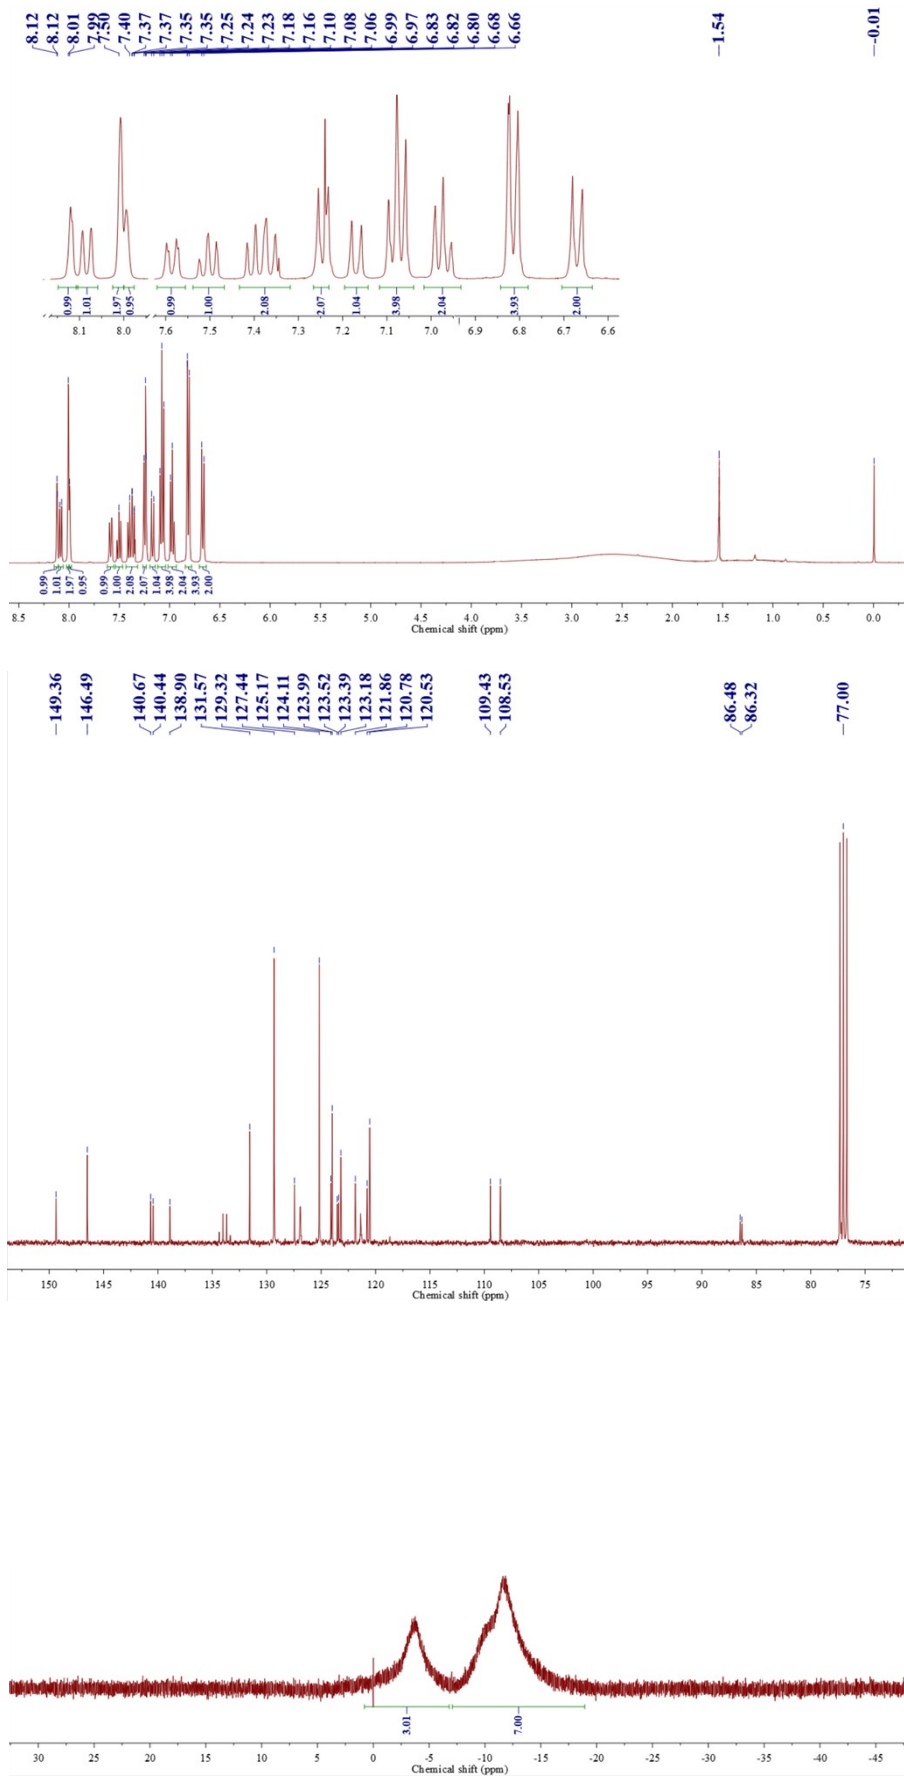

Figure S4. <sup>1</sup>H, <sup>13</sup>C and <sup>11</sup>B NMR spectra of CB-CF<sub>3</sub>.

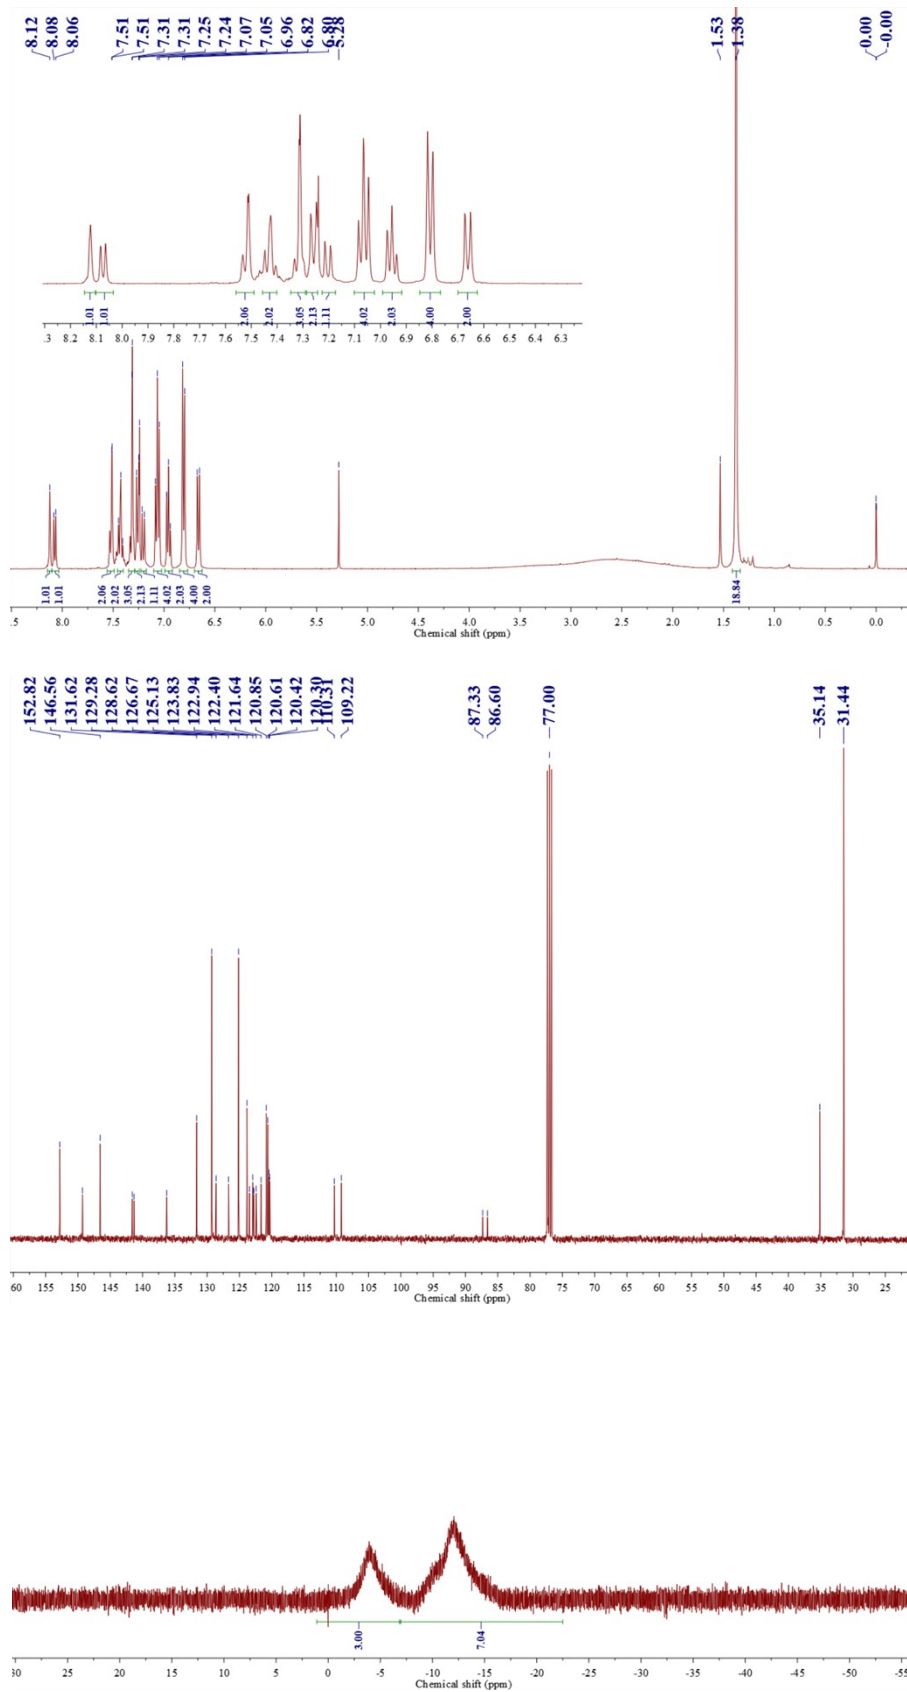

Figure S5.  $^1\text{H}$ ,  $^{13}\text{C}$  and  $^{11}\text{B}$  NMR spectra of CB-Bu.

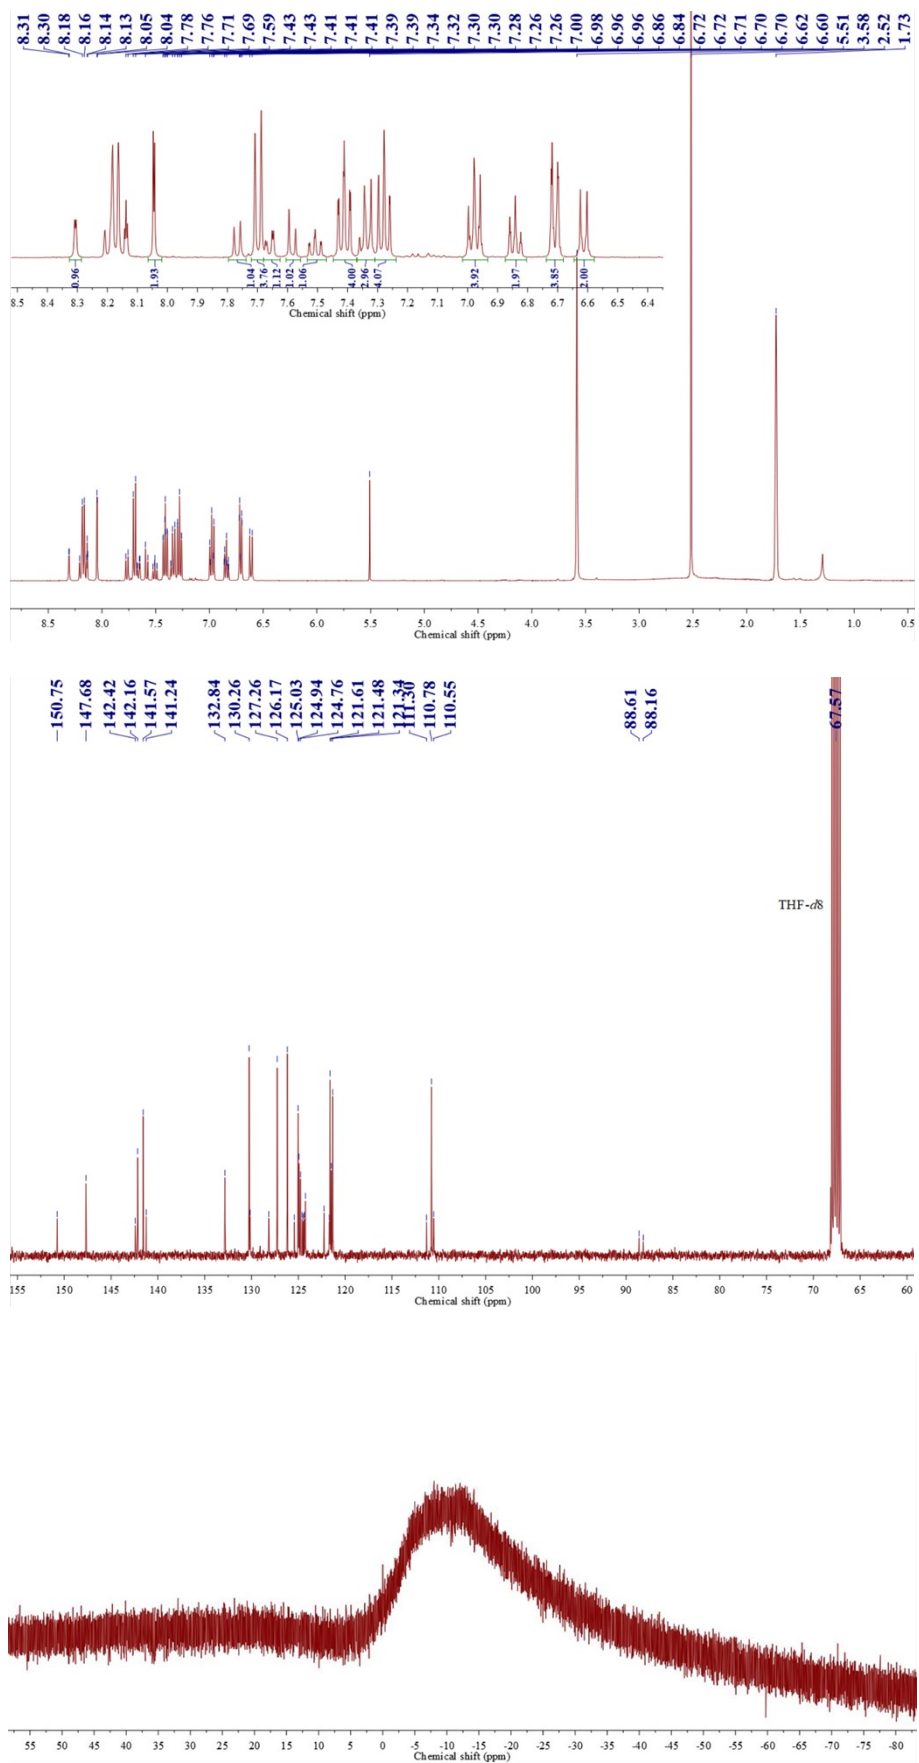

Figure S6.  $^1\text{H}$ ,  $^{13}\text{C}$  and  $^{11}\text{B}$  NMR spectra of CB-Cz (in THF- $d_8$ , poorly dissolved)

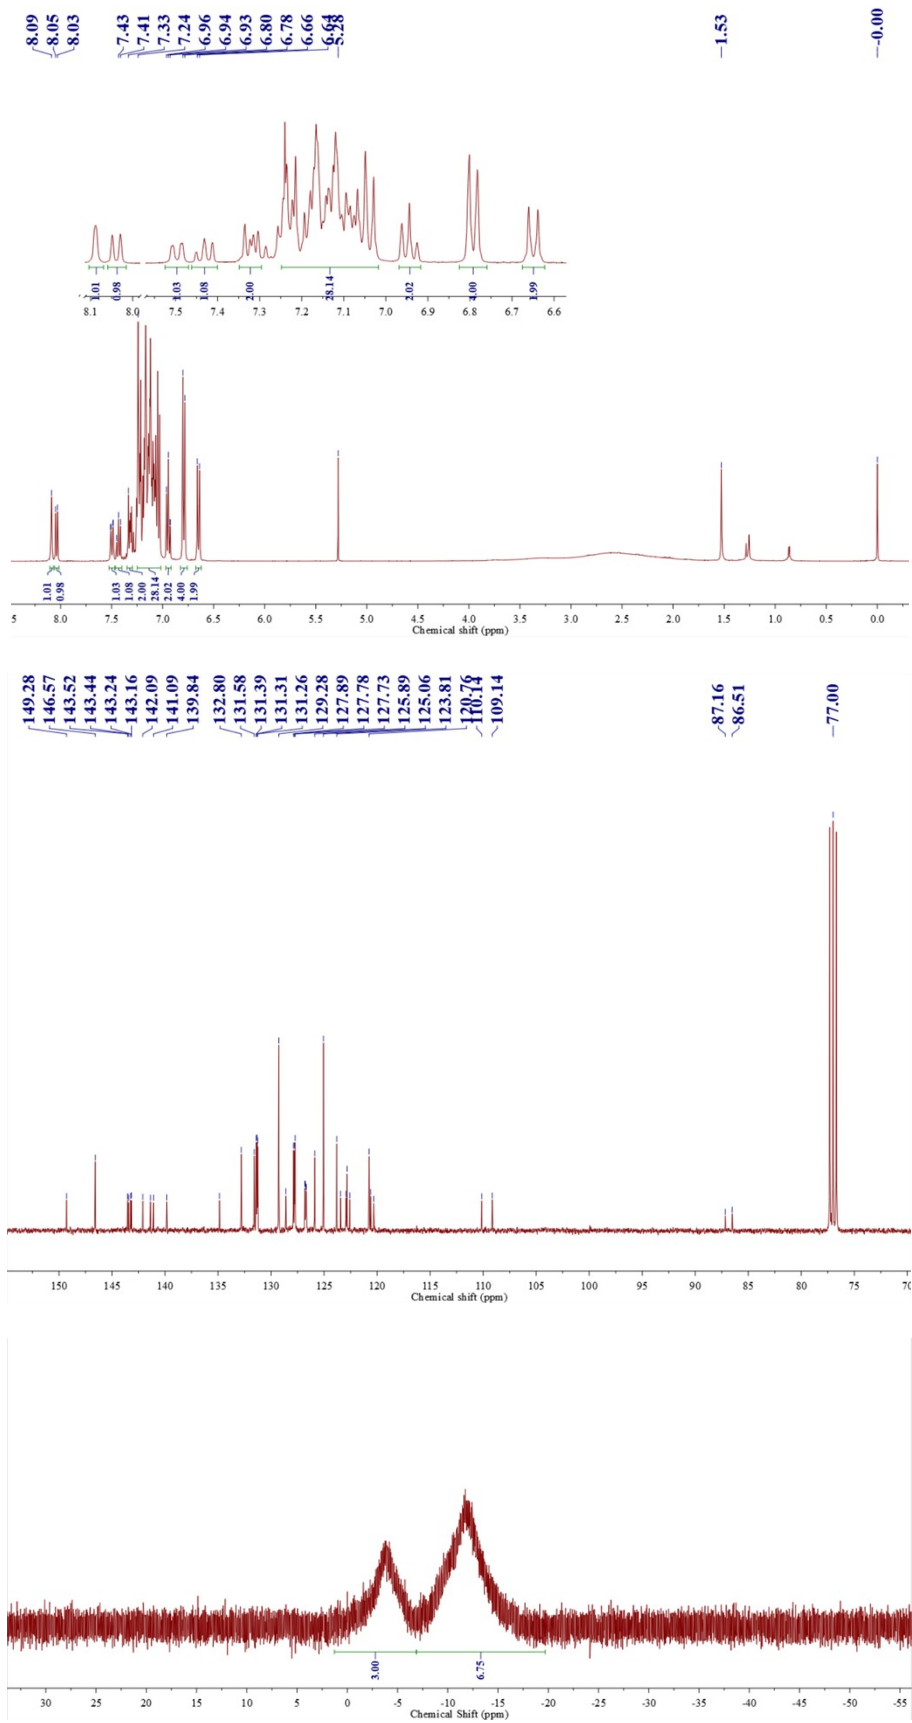

Figure S7. <sup>1</sup>H, <sup>13</sup>C and <sup>11</sup>B NMR spectra of CB-TPE.



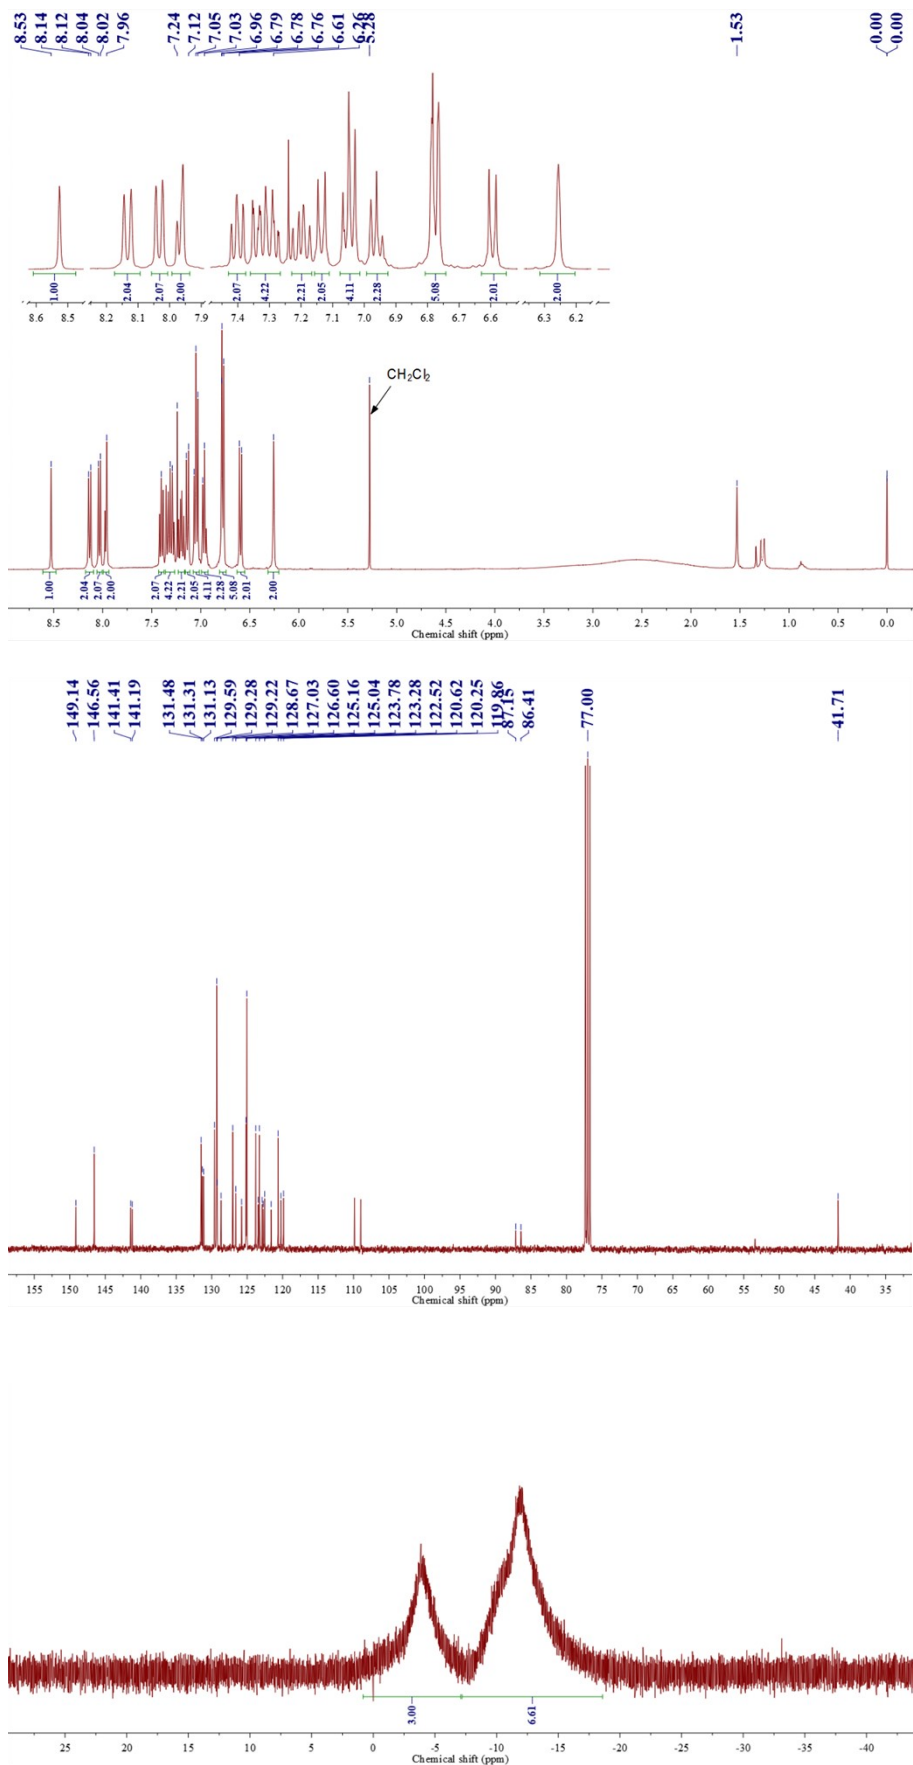

Figure S8.  $^1\text{H}$ ,  $^{13}\text{C}$  and  $^{11}\text{B}$  NMR spectra of CB-An.

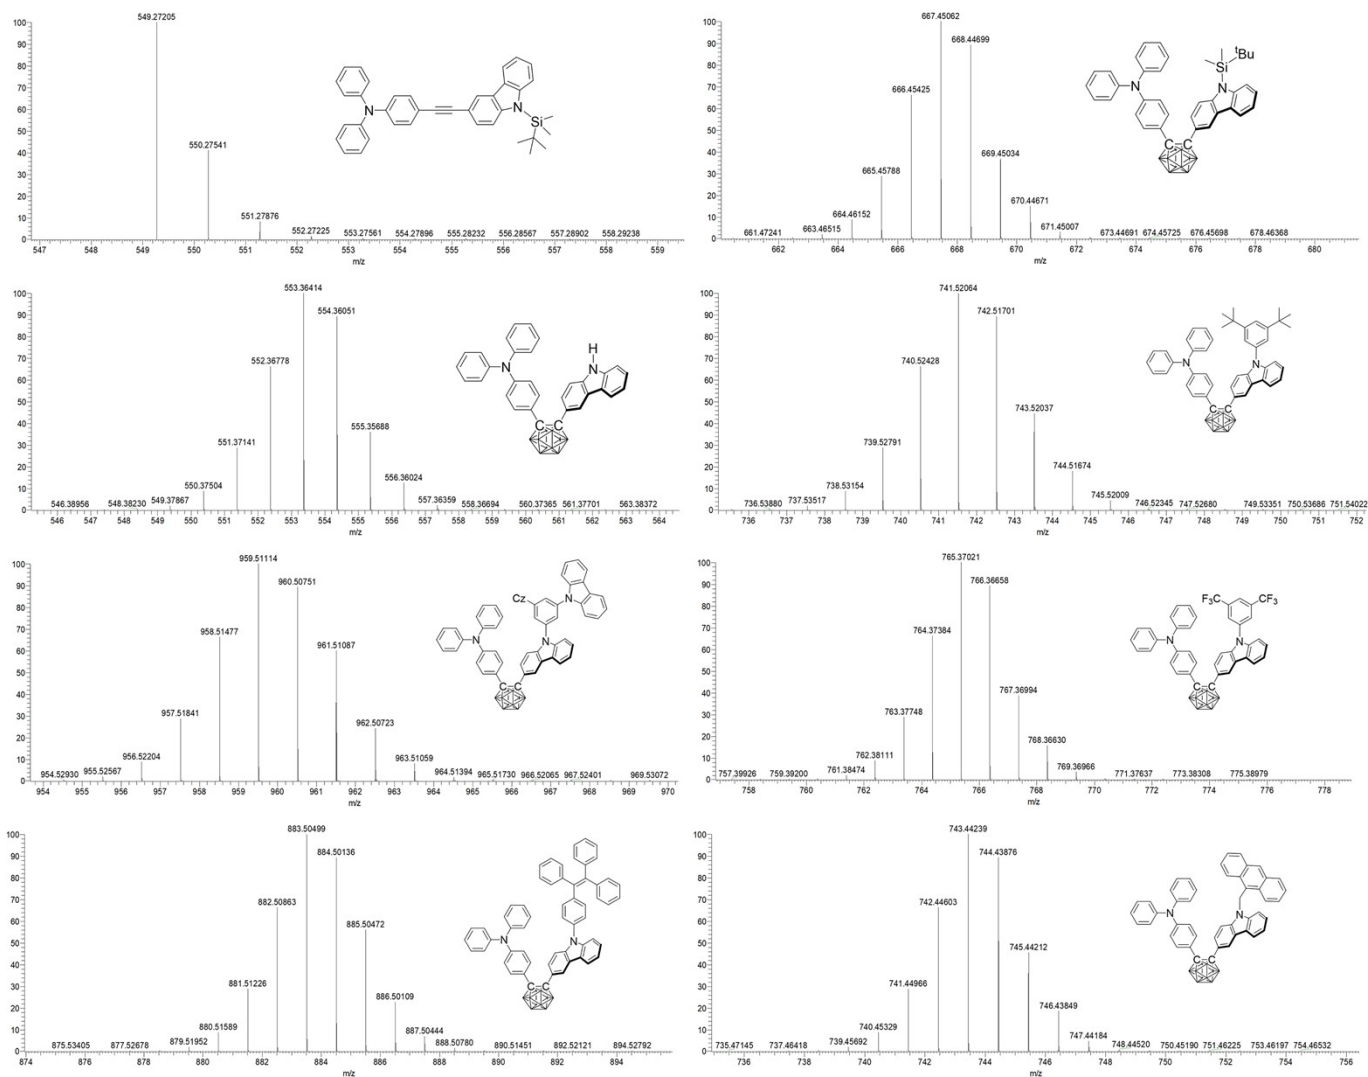

Figure S9. HRMS spectra of the synthesized compounds.

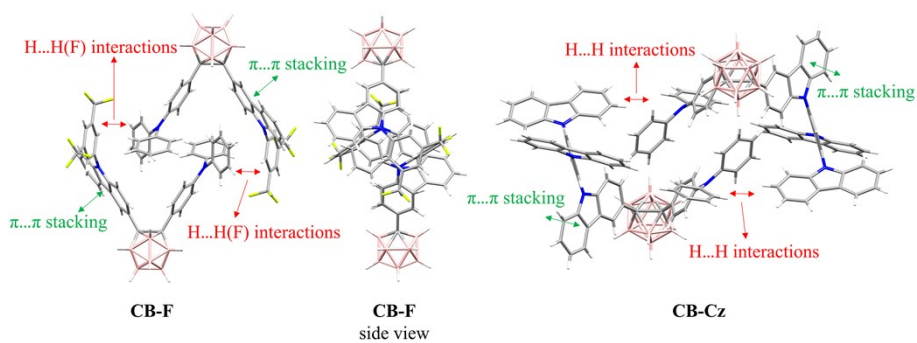

Figure S10. An analysis of intermolecular interactions and vibrations along carbonyl C-C bonds in the two crystals.

**Table S1.** Crystallographic data of **CB-Cz** and **CB-CF<sub>3</sub>**

| Crystals                 | CB-CF <sub>3</sub>                                                            | CB-Cz                                                                                         |
|--------------------------|-------------------------------------------------------------------------------|-----------------------------------------------------------------------------------------------|
| CCDC number              | 2111386                                                                       | 2111387                                                                                       |
| Empirical formula        | C <sub>40</sub> H <sub>34</sub> B <sub>10</sub> F <sub>6</sub> N <sub>2</sub> | C <sub>62</sub> H <sub>50</sub> B <sub>10</sub> N <sub>4</sub> ·C <sub>7</sub> H <sub>8</sub> |
| Formula weight (g/mol)   | 764.79                                                                        | 1051.29                                                                                       |
| Temperature (K)          | 273                                                                           | 273                                                                                           |
| Wavelength (Å)           | 1.54178                                                                       | 1.54178                                                                                       |
| Crystal system           | Triclinic                                                                     | Triclinic                                                                                     |
| Space group              | P -1                                                                          | P -1                                                                                          |
| Unit cell dimensions     | a = 11.9655 Å                                                                 | a = 13.6658 Å                                                                                 |
|                          | b = 13.7759 Å                                                                 | b = 15.1862 Å                                                                                 |
|                          | c = 16.4271 Å                                                                 | c = 15.5361 Å                                                                                 |
|                          | α = 75.949°                                                                   | α = 96.143°                                                                                   |
|                          | β = 70.772°                                                                   | β = 103.721°                                                                                  |
|                          | γ = 64.736°                                                                   | γ = 111.943°                                                                                  |
| Volume (Å <sup>3</sup> ) | 2295.5                                                                        | 2836.0                                                                                        |
| Z                        | 2                                                                             | 2                                                                                             |
| Dx, g/cm <sup>3</sup>    | 1.107                                                                         | 1.231                                                                                         |
| Mu (mm <sup>-1</sup> )   | 0.642                                                                         | 0.518                                                                                         |
| F000                     | 784.0                                                                         | 1100.0                                                                                        |
| F000'                    | 786.50                                                                        | 1102.74                                                                                       |
| h, k, l max              | 13, 16, 19                                                                    | 15, 17, 18                                                                                    |
| N <sub>ref</sub>         | 7626                                                                          | 9357                                                                                          |
| R(reflections)           | 0.0927                                                                        | 0.0603                                                                                        |
| wR2(reflections)         | 0.3029                                                                        | 0.1623                                                                                        |
| S(GOOF)                  | 1.050                                                                         | 1.064                                                                                         |

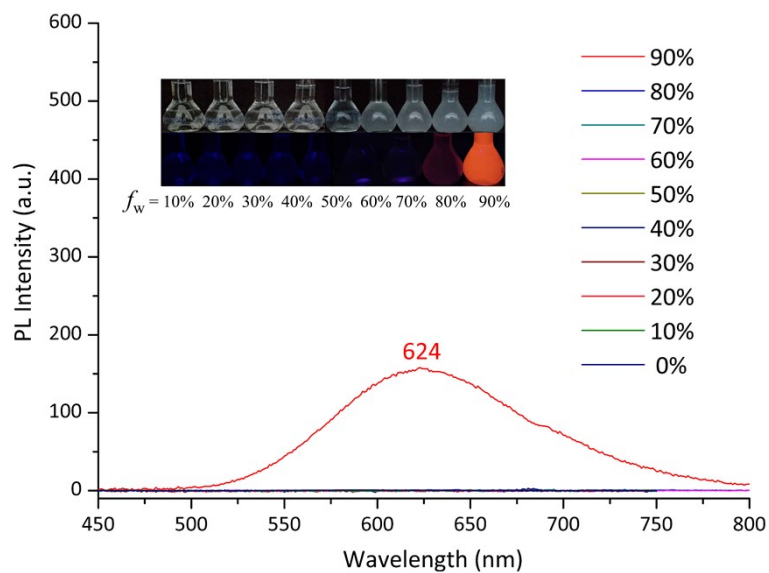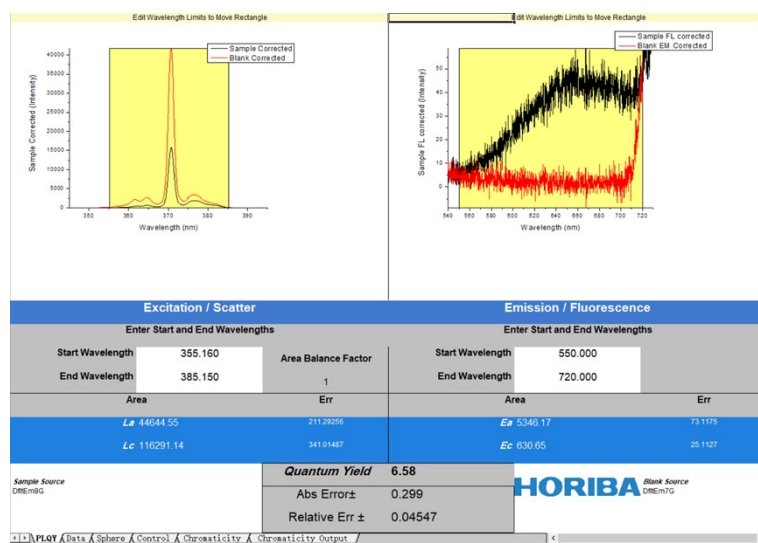

**Figure S11.** (up) PL appearance of **CB-H** in different ratios of THF/water under the irradiation of 365 nm. The concentrations were controlled at 0.1 g/L; (down) PL efficiency evaluation of **CB-H** aggregates in THF/water ( $f_w = 90\%$ ).

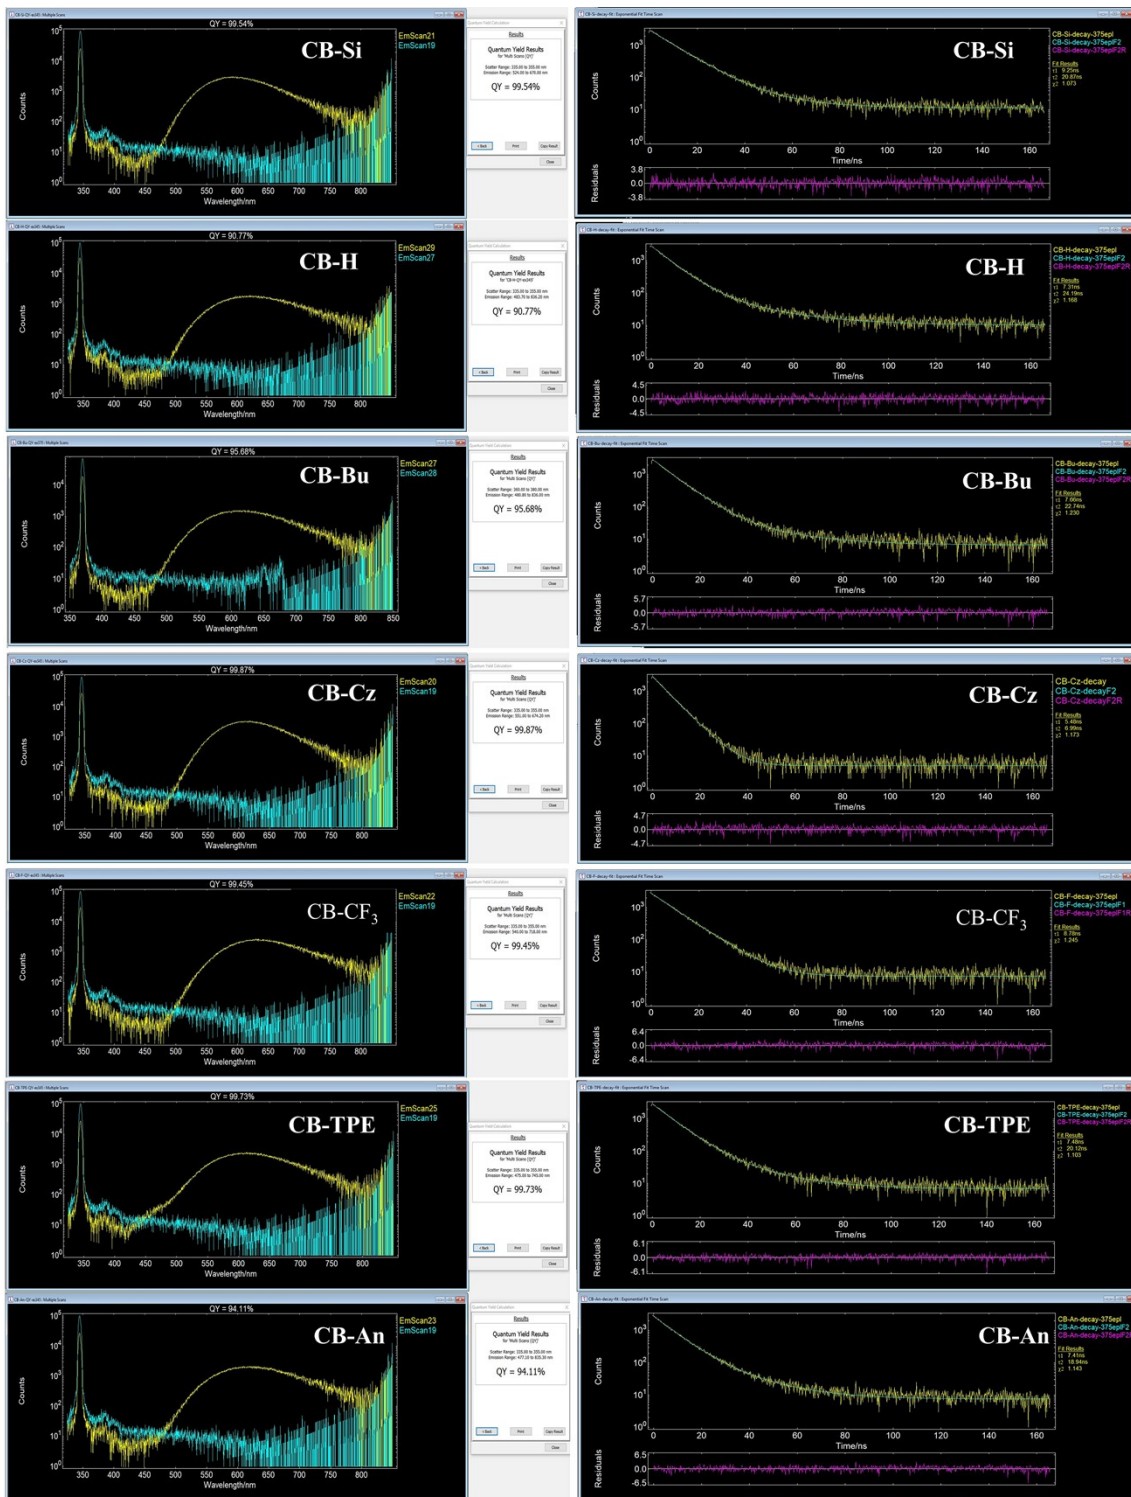

**Figure S12.** Evaluations of quantum efficiencies and PL decay curves of the carboranes. All the data were provided by Shiyanjia Lab ([www.shiyanjia.com](http://www.shiyanjia.com))

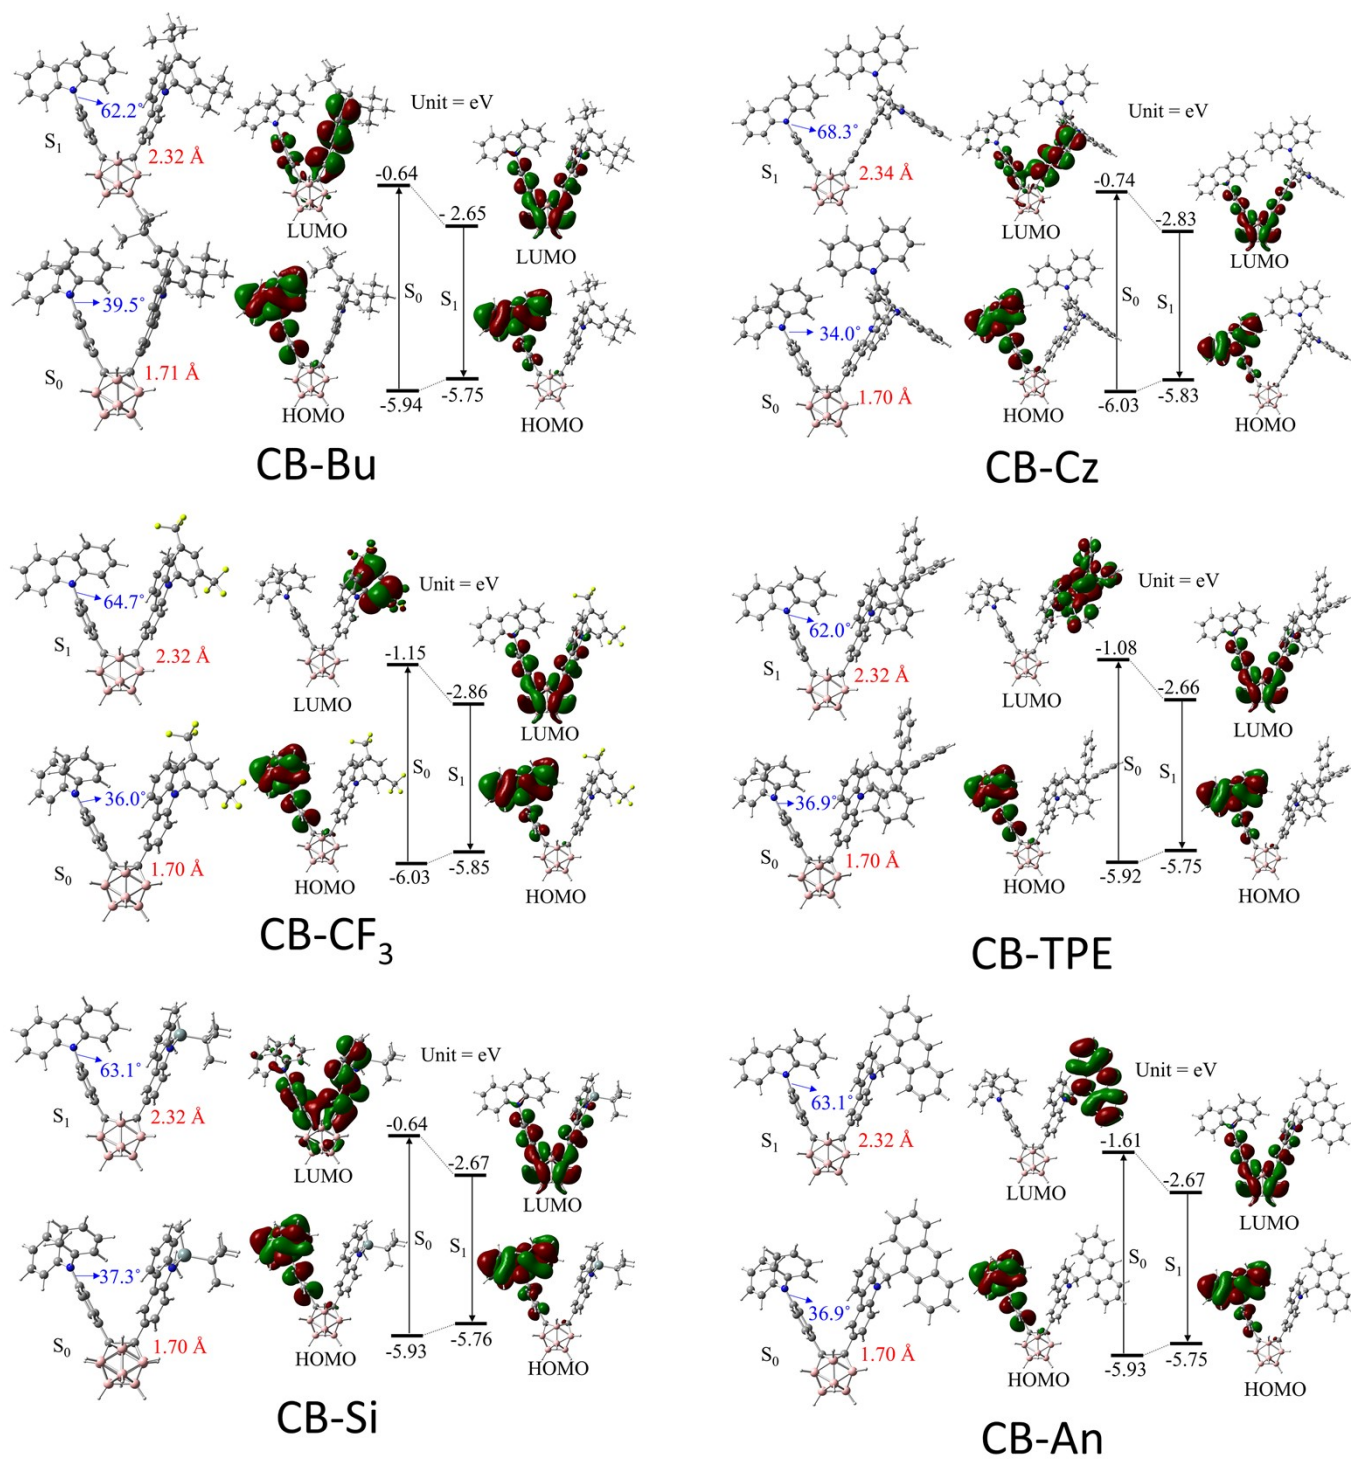

**Figure S13.** Optimized structures and electronic transitions of the derived carboranes (free) at the ground ( $S_0$ ) and first excited ( $S_1$ ) state.

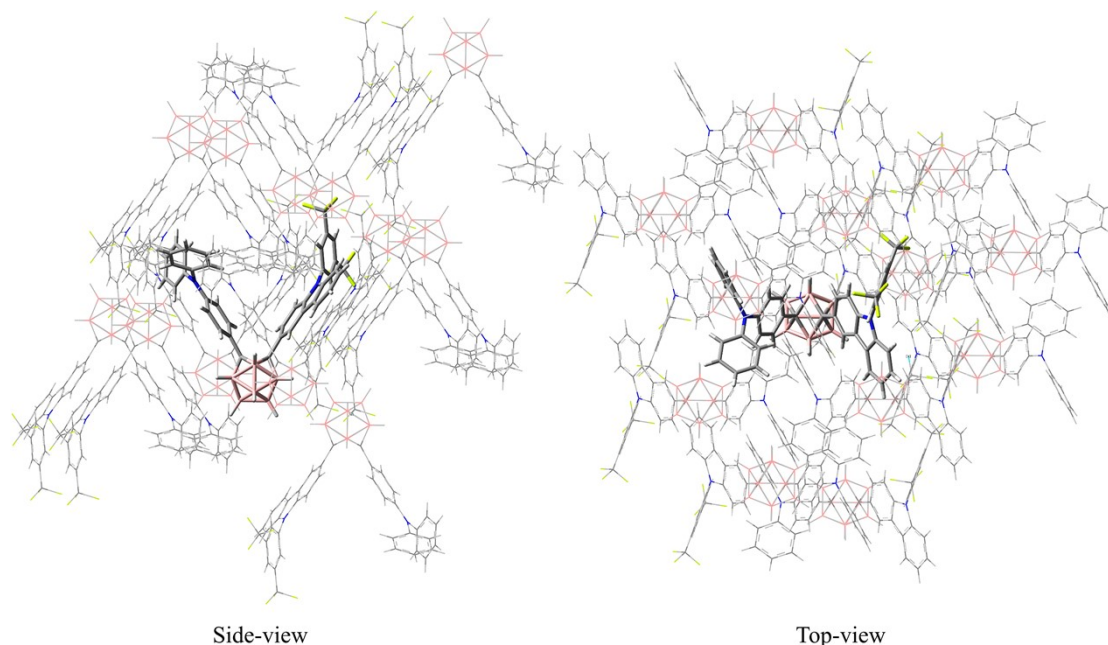

**Figure S14.** Different views of the selected cluster from **CB-CF<sub>3</sub>** crystal for the ONIOM modelling.

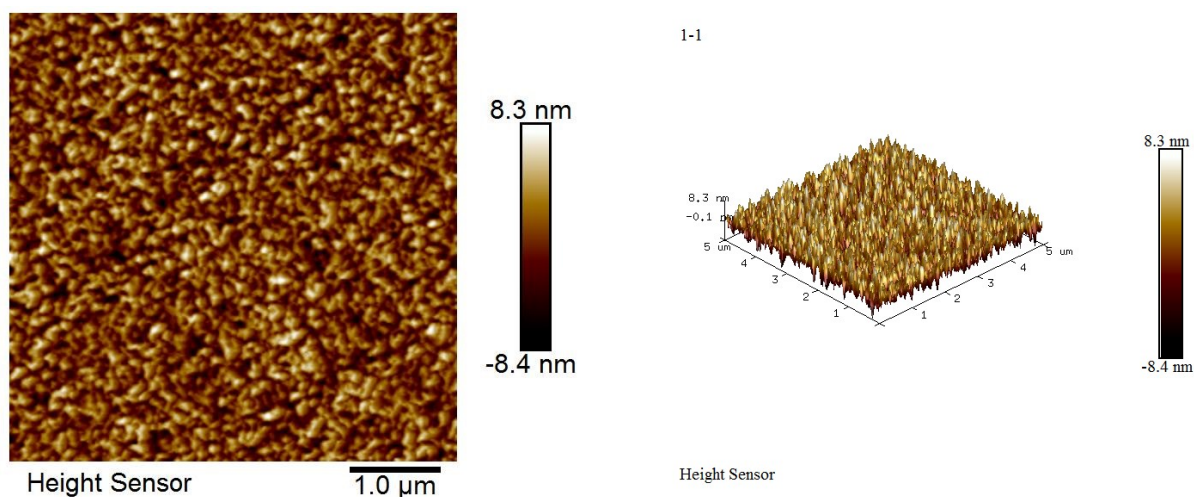

**Figure S15.** Atomic force microscopy of the vapor-deposited film of **CB-Bu** (30 nm).

**Table S2.** Coordinates of the optimized structures of carboranes in the ground and first excited states

| CB-H at S <sub>0</sub> |           |           | CB-H at S <sub>1</sub> |   |           |           |           |
|------------------------|-----------|-----------|------------------------|---|-----------|-----------|-----------|
| C                      | -1.539976 | 2.829597  | 1.928173               | C | -1.927946 | 2.9051    | 1.691488  |
| C                      | -2.897008 | 0.754845  | 0.679114               | C | -3.124329 | 0.61424   | 0.645646  |
| C                      | -3.639837 | -0.388821 | 0.059783               | C | -3.691815 | -0.644778 | 0.158432  |
| C                      | -3.023282 | 0.983416  | 2.059538               | C | -3.170484 | 0.913372  | 2.025628  |
| H                      | -3.662004 | 0.336681  | 2.643691               | H | -3.679997 | 0.221399  | 2.682127  |
| C                      | -1.244532 | -1.655531 | -0.424968              | C | -0.827495 | -2.21528  | -0.320699 |
| C                      | -0.110904 | 4.396416  | 1.19285                | C | -0.716828 | 4.566425  | 0.786123  |
| C                      | -2.080296 | 1.586043  | -0.07628               | C | -2.478213 | 1.506578  | -0.207882 |
| H                      | -1.969507 | 1.430522  | -1.138613              | H | -2.436713 | 1.297771  | -1.267434 |
| C                      | -2.361858 | 2.014177  | 2.696058               | C | -2.59273  | 2.045193  | 2.559689  |
| H                      | -2.482263 | 2.170451  | 3.759884               | H | -2.649582 | 2.245739  | 3.622014  |

|   |           |           |           |   |           |           |           |
|---|-----------|-----------|-----------|---|-----------|-----------|-----------|
| C | -1.392423 | 2.620433  | 0.543259  | C | -1.871022 | 2.644642  | 0.311008  |
| C | -0.472327 | 3.626044  | 0.069706  | C | -1.094261 | 3.713041  | -0.274399 |
| C | -0.496153 | -1.275653 | -1.538914 | C | -0.114509 | -1.872502 | -1.479629 |
| C | -2.735328 | -1.719658 | -0.500656 | C | -2.276295 | -2.409214 | -0.373745 |
| C | -0.55434  | -1.988769 | 0.738264  | C | -0.120385 | -2.289786 | 0.887493  |
| C | 0.822915  | -1.899522 | 0.806189  | C | 1.216435  | -1.946986 | 0.955227  |
| C | 0.773541  | 5.463422  | 1.096691  | C | 0.061259  | 5.698746  | 0.57196   |
| H | 1.04582   | 6.050446  | 1.964245  | H | 0.344142  | 6.349779  | 1.389498  |
| C | 0.067968  | 3.93531   | -1.175559 | C | -0.686772 | 4.014873  | -1.570581 |
| H | -0.199089 | 3.356142  | -2.050437 | H | -0.975165 | 3.376636  | -2.396367 |
| C | 1.295348  | 5.750758  | -0.152247 | C | 0.45566   | 5.973207  | -0.72764  |
| H | 1.98496   | 6.57821   | -0.258332 | H | 1.05382   | 6.854389  | -0.922641 |
| C | 0.8805    | -1.191012 | -1.483483 | C | 1.219843  | -1.523842 | -1.423094 |
| C | 0.948625  | 4.997864  | -1.278762 | C | 0.087268  | 5.142827  | -1.79055  |
| H | 1.369276  | 5.25562   | -2.241878 | H | 0.402547  | 5.390886  | -2.795598 |
| B | -3.511144 | -0.6738   | -1.614872 | B | -3.188309 | -1.321916 | -1.333897 |
| H | -2.855624 | 0.047316  | -2.27605  | H | -2.586845 | -0.634115 | -2.094774 |
| B | -3.510681 | -2.423861 | -1.835821 | B | -3.087355 | -3.139623 | -1.575423 |
| H | -2.814035 | -2.878421 | -2.677457 | H | -2.439794 | -3.621598 | -2.449092 |
| B | -5.118466 | -0.930452 | 0.701034  | B | -4.945569 | -1.445686 | 0.800499  |
| H | -5.565745 | -0.335214 | 1.620157  | H | -5.526668 | -0.922453 | 1.695461  |
| B | -3.593548 | -3.16632  | -0.238903 | B | -3.13219  | -3.703157 | 0.119661  |
| H | -2.948302 | -4.124843 | 0.016131  | H | -2.517134 | -4.618438 | 0.564103  |
| B | -5.041328 | -0.190279 | -0.893163 | B | -4.907    | -0.887276 | -0.896837 |
| H | -5.410073 | 0.920168  | -1.067015 | H | -5.440743 | 0.081089  | -1.329962 |
| B | -4.990293 | -1.48796  | -2.095752 | B | -4.603254 | -2.30142  | -1.905448 |
| H | -5.421404 | -1.324704 | -3.188    | H | -5.013725 | -2.298152 | -3.020706 |
| B | -3.636683 | -1.857119 | 0.941313  | B | -3.244523 | -2.095846 | 0.992205  |
| H | -3.069311 | -1.871804 | 1.974455  | H | -2.708912 | -1.958974 | 2.045207  |
| B | -5.05517  | -3.039104 | -1.231017 | B | -4.59236  | -3.770206 | -0.888462 |
| H | -5.546207 | -4.008165 | -1.706254 | H | -5.022207 | -4.81829  | -1.248772 |
| B | -5.122203 | -2.689235 | 0.509596  | B | -4.673082 | -3.191608 | 0.80076   |
| H | -5.658145 | -3.386266 | 1.30497   | H | -5.148981 | -3.832644 | 1.681088  |
| B | -5.998637 | -1.660065 | -0.645446 | B | -5.666216 | -2.441019 | -0.479788 |
| H | -7.183137 | -1.618653 | -0.681805 | H | -6.846976 | -2.561091 | -0.545487 |
| H | -0.994388 | -1.058826 | -2.473442 | H | -0.635259 | -1.846344 | -2.426241 |
| H | 1.438267  | -0.895936 | -2.361598 | H | 1.750477  | -1.223032 | -2.317643 |
| H | 1.331242  | -2.143657 | 1.728698  | H | 1.741603  | -1.963032 | 1.901868  |
| H | -1.096569 | -2.309161 | 1.615491  | H | -0.644053 | -2.583051 | 1.785619  |
| N | -0.766798 | 3.898996  | 2.295726  | N | -1.229676 | 4.062788  | 1.954905  |
| C | 1.564467  | -1.48134  | -0.300435 | C | 1.87543   | -1.536158 | -0.197526 |
| N | 2.954442  | -1.351301 | -0.234454 | N | 3.222797  | -1.052379 | -0.113129 |
| C | 3.596348  | -0.298431 | -0.924061 | C | 3.447347  | 0.284352  | -0.387086 |
| C | 4.776714  | -0.537979 | -1.625547 | C | 4.680459  | 0.718916  | -0.914607 |
| C | 3.064058  | 0.990259  | -0.901154 | C | 2.408596  | 1.217254  | -0.194253 |
| C | 5.414469  | 0.499071  | -2.287181 | C | 4.868476  | 2.052415  | -1.205209 |
| H | 5.188365  | -1.538509 | -1.644045 | H | 5.451985  | -0.004182 | -1.138327 |
| C | 3.698872  | 2.017507  | -1.580788 | C | 2.618013  | 2.547884  | -0.484274 |



|   |           |           |           |   |           |           |           |
|---|-----------|-----------|-----------|---|-----------|-----------|-----------|
| H | 2.152531  | 1.183915  | -0.350665 | H | 1.45768   | 0.885087  | 0.195813  |
| C | 4.878225  | 1.779464  | -2.273342 | C | 3.846075  | 2.97319   | -0.986498 |
| H | 6.330963  | 0.29984   | -2.82794  | H | 5.808361  | 2.37626   | -1.631365 |
| H | 3.269985  | 3.01128   | -1.550591 | H | 1.819362  | 3.260139  | -0.326654 |
| H | 5.376456  | 2.584914  | -2.796851 | H | 3.996321  | 4.017371  | -1.224059 |
| C | 3.720672  | -2.222503 | 0.567475  | C | 4.224692  | -1.932675 | 0.256719  |
| C | 4.755587  | -1.725447 | 1.358656  | C | 5.353432  | -1.491504 | 0.972147  |
| C | 3.459568  | -3.592617 | 0.56946   | C | 4.083712  | -3.300035 | -0.039068 |
| C | 5.515991  | -2.587547 | 2.132135  | C | 6.326615  | -2.395129 | 1.343564  |
| H | 4.959322  | -0.662902 | 1.359087  | H | 5.427368  | -0.454664 | 1.268223  |
| C | 4.212982  | -4.444018 | 1.361085  | C | 5.071527  | -4.186201 | 0.332901  |
| H | 2.664416  | -3.982792 | -0.052166 | H | 3.207738  | -3.63685  | -0.57396  |
| C | 5.247422  | -3.949154 | 2.143305  | C | 6.198091  | -3.742664 | 1.020649  |
| H | 6.317066  | -2.18732  | 2.740557  | H | 7.181599  | -2.052606 | 1.910493  |
| H | 3.997872  | -5.504984 | 1.352776  | H | 4.965312  | -5.233433 | 0.085317  |
| H | 5.839253  | -4.618278 | 2.753788  | H | 6.963443  | -4.446343 | 1.318159  |
| H | -0.688785 | 4.26229   | 3.225284  | H | -1.150635 | 4.49566   | 2.853704  |

| CB-Si at S <sub>0</sub> |           |           |           | CB-Si at S <sub>1</sub> |           |           |           |
|-------------------------|-----------|-----------|-----------|-------------------------|-----------|-----------|-----------|
| C                       | -2.523503 | 0.287893  | -0.178382 | C                       | -2.609572 | 0.532676  | -0.200847 |
| C                       | -0.910171 | 2.555973  | 0.124091  | C                       | -0.884565 | 2.731294  | 0.114855  |
| C                       | -0.04632  | 3.774782  | 0.222428  | C                       | 0.077371  | 3.832273  | 0.194454  |
| C                       | -1.708987 | 2.370074  | -1.013861 | C                       | -1.611051 | 2.515927  | -1.074775 |
| H                       | -1.703019 | 3.121222  | -1.790734 | H                       | -1.487645 | 3.220932  | -1.885637 |
| C                       | 2.183637  | 2.174446  | 0.039698  | C                       | 2.795565  | 1.976387  | -0.022587 |
| C                       | -2.909915 | -1.474234 | 1.139382  | C                       | -3.166985 | -1.16085  | 1.152038  |
| C                       | -0.942628 | 1.598399  | 1.127263  | C                       | -1.071288 | 1.836179  | 1.164567  |
| H                       | -0.352914 | 1.716989  | 2.023715  | H                       | -0.543144 | 1.98297   | 2.096081  |
| C                       | -2.518772 | 1.263159  | -1.17327  | C                       | -2.471294 | 1.451294  | -1.241963 |
| H                       | -3.132721 | 1.180894  | -2.055834 | H                       | -3.015741 | 1.351591  | -2.167739 |
| C                       | -1.739069 | 0.472225  | 0.975312  | C                       | -1.918147 | 0.746487  | 1.003041  |
| C                       | -1.984694 | -0.662107 | 1.822355  | C                       | -2.27718  | -0.339321 | 1.875642  |
| C                       | 2.636507  | 1.517507  | 1.183608  | C                       | 3.173155  | 1.296441  | 1.145662  |
| C                       | 1.641226  | 3.563776  | 0.130087  | C                       | 2.346514  | 3.366279  | 0.042514  |
| C                       | 2.271553  | 1.498891  | -1.175302 | C                       | 2.793716  | 1.260085  | -1.228079 |
| C                       | 2.742179  | 0.201304  | -1.242347 | C                       | 3.06386   | -0.094408 | -1.254364 |
| C                       | -3.388623 | -2.639639 | 1.733863  | C                       | -3.711784 | -2.295058 | 1.752675  |
| H                       | -4.124145 | -3.262597 | 1.249955  | H                       | -4.419764 | -2.924515 | 1.236988  |
| C                       | -1.513837 | -1.025147 | 3.080569  | C                       | -1.923568 | -0.657559 | 3.183143  |
| H                       | -0.802228 | -0.39666  | 3.601226  | H                       | -1.246205 | -0.017094 | 3.734118  |
| C                       | -2.911294 | -2.984424 | 2.986582  | C                       | -3.344166 | -2.598082 | 3.054379  |
| H                       | -3.280534 | -3.886689 | 3.457133  | H                       | -3.771673 | -3.472799 | 3.528386  |
| C                       | 3.115842  | 0.224333  | 1.125646  | C                       | 3.440286  | -0.057392 | 1.131827  |
| C                       | -1.97745  | -2.192452 | 3.658357  | C                       | -2.455027 | -1.793145 | 3.769017  |
| H                       | -1.630543 | -2.486217 | 4.640379  | H                       | -2.196026 | -2.049646 | 4.787954  |
| B                       | 0.909637  | 4.024465  | 1.610178  | B                       | 1.338966  | 3.816614  | 1.354212  |
| H                       | 0.862074  | 3.245442  | 2.492103  | H                       | 1.261913  | 3.057945  | 2.26631   |
| B                       | 2.42313   | 4.746331  | 1.062547  | B                       | 2.990313  | 4.525052  | 0.97951   |

|    |           |           |           |    |           |           |           |
|----|-----------|-----------|-----------|----|-----------|-----------|-----------|
| H  | 3.423321  | 4.421558  | 1.605264  | H  | 3.955417  | 4.234002  | 1.61097   |
| B  | -0.484352 | 5.230998  | -0.538161 | B  | 0.000726  | 5.238432  | -0.607392 |
| H  | -1.524927 | 5.263189  | -1.099533 | H  | -0.977233 | 5.449501  | -1.248782 |
| B  | 2.353652  | 4.871256  | -0.694751 | B  | 2.90742   | 4.639908  | -0.802259 |
| H  | 3.30348   | 4.624857  | -1.356076 | H  | 3.805312  | 4.43417   | -1.553976 |
| B  | -0.416188 | 5.111889  | 1.215906  | B  | 0.085904  | 5.131874  | 1.17445   |
| H  | -1.405813 | 5.035725  | 1.859423  | H  | -0.824906 | 5.240232  | 1.928647  |
| B  | 1.143231  | 5.75908   | 1.746945  | B  | 1.729761  | 5.562585  | 1.645867  |
| H  | 1.266501  | 6.251881  | 2.818184  | H  | 1.902675  | 6.039769  | 2.720419  |
| B  | 0.79694   | 4.216057  | -1.201454 | B  | 1.227835  | 3.96937   | -1.092949 |
| H  | 0.633059  | 3.550582  | -2.160464 | H  | 1.010669  | 3.325363  | -2.068843 |
| B  | 2.032556  | 6.297016  | 0.305635  | B  | 2.649079  | 6.080078  | 0.204023  |
| H  | 2.805297  | 7.19588   | 0.338188  | H  | 3.459657  | 6.949381  | 0.222781  |
| B  | 1.022714  | 5.955801  | -1.115835 | B  | 1.590183  | 5.740064  | -1.195203 |
| H  | 1.046712  | 6.595506  | -2.11383  | H  | 1.643784  | 6.355541  | -2.210446 |
| B  | 0.27858   | 6.520698  | 0.397     | B  | 0.93204   | 6.437142  | 0.311464  |
| H  | -0.238455 | 7.583988  | 0.487837  | H  | 0.540109  | 7.556115  | 0.396605  |
| H  | 2.630852  | 2.029227  | 2.135797  | H  | 3.217657  | 1.841676  | 2.077668  |
| H  | 3.461682  | -0.263547 | 2.026567  | H  | 3.693387  | -0.579796 | 2.045757  |
| H  | 2.778669  | -0.307461 | -2.195718 | H  | 3.013933  | -0.647804 | -2.183594 |
| H  | 1.952114  | 1.982046  | -2.086731 | H  | 2.537191  | 1.77291   | -2.143549 |
| N  | -3.225459 | -0.910299 | -0.100167 | N  | -3.365554 | -0.643262 | -0.127958 |
| C  | 3.155212  | -0.466237 | -0.087938 | C  | 3.357594  | -0.756209 | -0.067353 |
| N  | 3.594477  | -1.792706 | -0.135079 | N  | 3.509117  | -2.181104 | -0.065336 |
| C  | 3.268266  | -2.67865  | 0.915942  | C  | 2.572782  | -2.930147 | 0.624288  |
| C  | 4.225613  | -3.564437 | 1.407719  | C  | 2.916834  | -4.17227  | 1.195109  |
| C  | 1.98615   | -2.684143 | 1.464545  | C  | 1.27334   | -2.417606 | 0.810914  |
| C  | 3.899539  | -4.444366 | 2.427185  | C  | 1.97316   | -4.885431 | 1.901586  |
| H  | 5.220918  | -3.558468 | 0.983221  | H  | 3.933022  | -4.532884 | 1.120573  |
| C  | 1.674347  | -3.554726 | 2.496591  | C  | 0.341157  | -3.148605 | 1.515076  |
| H  | 1.236107  | -2.004049 | 1.081983  | H  | 1.010436  | -1.459497 | 0.386826  |
| C  | 2.626299  | -4.4418   | 2.980391  | C  | 0.682892  | -4.384361 | 2.060146  |
| H  | 4.652243  | -5.127618 | 2.79963   | H  | 2.24942   | -5.826845 | 2.356932  |
| H  | 0.673491  | -3.542756 | 2.909693  | H  | -0.656617 | -2.752566 | 1.648421  |
| H  | 2.37829   | -5.126158 | 3.781136  | H  | -0.051362 | -4.944357 | 2.622868  |
| C  | 4.302488  | -2.275048 | -1.255081 | C  | 4.564358  | -2.739989 | -0.765947 |
| C  | 4.00865   | -3.528828 | -1.789917 | C  | 4.450931  | -4.009572 | -1.361804 |
| C  | 5.312909  | -1.507652 | -1.834535 | C  | 5.749341  | -2.001587 | -0.930566 |
| C  | 4.718526  | -4.004064 | -2.880767 | C  | 5.512568  | -4.532407 | -2.06993  |
| H  | 3.225064  | -4.125732 | -1.342502 | H  | 3.515422  | -4.547409 | -1.300587 |
| C  | 6.003818  | -1.983442 | -2.936959 | C  | 6.802364  | -2.544815 | -1.634767 |
| H  | 5.551128  | -0.539089 | -1.414966 | H  | 5.826618  | -1.020985 | -0.483998 |
| C  | 5.715208  | -3.234557 | -3.464461 | C  | 6.694738  | -3.81063  | -2.204485 |
| H  | 4.479992  | -4.980007 | -3.2842   | H  | 5.411633  | -5.500327 | -2.541859 |
| H  | 6.784803  | -1.375762 | -3.376042 | H  | 7.717437  | -1.978599 | -1.741379 |
| H  | 6.262835  | -3.606549 | -4.320268 | H  | 7.521945  | -4.225352 | -2.76413  |
| Si | -4.246563 | -1.643891 | -1.386998 | Si | -4.374247 | -1.345045 | -1.432914 |
| C  | -4.092666 | -3.514878 | -1.302236 | C  | -4.366623 | -3.221688 | -1.284779 |

|   |           |           |           |   |           |           |           |
|---|-----------|-----------|-----------|---|-----------|-----------|-----------|
| H | -3.08696  | -3.821558 | -1.012333 | H | -3.397142 | -3.594548 | -0.952048 |
| H | -4.800294 | -3.989614 | -0.62325  | H | -5.130372 | -3.618368 | -0.616398 |
| H | -4.285221 | -3.917352 | -2.298627 | H | -4.558706 | -3.640737 | -2.274465 |
| C | -3.578095 | -1.132798 | -3.067346 | C | -3.598695 | -0.953696 | -3.100019 |
| H | -3.858873 | -1.899977 | -3.791571 | H | -3.889877 | -1.734083 | -3.80584  |
| H | -3.973009 | -0.186456 | -3.435612 | H | -3.919004 | -0.002322 | -3.5234   |
| H | -2.489364 | -1.067821 | -3.063472 | H | -2.509589 | -0.946417 | -3.043931 |
| C | -6.041908 | -1.077589 | -1.149518 | C | -6.137284 | -0.654609 | -1.306387 |
| C | -6.561127 | -1.527638 | 0.216477  | C | -6.744372 | -1.008412 | 0.051713  |
| H | -5.968522 | -1.113189 | 1.034354  | H | -6.16186  | -0.595505 | 0.877466  |
| H | -7.593451 | -1.191092 | 0.354674  | H | -7.757324 | -0.600491 | 0.12719   |
| H | -6.56253  | -2.615334 | 0.318268  | H | -6.821624 | -2.088121 | 0.200105  |
| C | -6.128805 | 0.446628  | -1.23425  | C | -6.117581 | 0.866966  | -1.458305 |
| H | -5.522262 | 0.932365  | -0.467397 | H | -5.510117 | 1.346153  | -0.688402 |
| H | -5.807803 | 0.82417   | -2.207782 | H | -5.732769 | 1.179134  | -2.431727 |
| H | -7.163746 | 0.772143  | -1.089613 | H | -7.13344  | 1.265316  | -1.37197  |
| C | -6.901092 | -1.700155 | -2.252254 | C | -6.987431 | -1.268101 | -2.420954 |
| H | -6.882646 | -2.792183 | -2.219398 | H | -7.047651 | -2.356224 | -2.339848 |
| H | -7.944512 | -1.390255 | -2.137534 | H | -8.010536 | -0.882362 | -2.370521 |
| H | -6.578961 | -1.388205 | -3.248613 | H | -6.599404 | -1.025477 | -3.413169 |

**CB-An at S<sub>0</sub>**

|   |           |           |           |
|---|-----------|-----------|-----------|
| C | 1.489664  | -1.020242 | -0.415966 |
| C | -0.648669 | -2.784258 | -0.126479 |
| C | -1.791971 | -3.745724 | -0.027322 |
| C | 0.114301  | -2.747613 | -1.30355  |
| H | -0.135137 | -3.416632 | -2.114566 |
| C | -3.553834 | -1.629581 | -0.038861 |
| C | 2.357032  | 0.559586  | 0.914444  |
| C | -0.329614 | -1.918817 | 0.912125  |
| H | -0.901702 | -1.923046 | 1.827499  |
| C | 1.180175  | -1.883638 | -1.46356  |
| H | 1.734385  | -1.88641  | -2.392371 |
| C | 0.727061  | -1.032194 | 0.768403  |
| C | 1.280911  | -0.013583 | 1.621071  |
| C | -3.761971 | -0.928653 | 1.148796  |
| C | -3.374351 | -3.11273  | -0.02243  |
| C | -3.54419  | -0.904206 | -1.228114 |
| C | -3.685747 | 0.4703    | -1.231519 |
| C | 3.096271  | 1.607978  | 1.45361   |
| H | 3.918426  | 2.05791   | 0.917776  |
| C | 0.949233  | 0.457132  | 2.887856  |
| H | 0.125699  | 0.01959   | 3.438007  |
| C | 2.745571  | 2.059655  | 2.714064  |
| H | 3.310312  | 2.871519  | 3.154192  |
| C | -3.912032 | 0.443579  | 1.155088  |
| C | 1.687727  | 1.492978  | 3.430712  |
| H | 1.44919   | 1.865948  | 4.418223  |

**CB-An at S<sub>1</sub>**

|   |           |           |           |
|---|-----------|-----------|-----------|
| C | -1.569405 | 1.11747   | -0.378933 |
| C | 0.544272  | 2.931204  | -0.105428 |
| C | 1.696399  | 3.832517  | -0.037407 |
| C | -0.17125  | 2.799463  | -1.314272 |
| H | 0.123183  | 3.414185  | -2.153821 |
| C | 4.033068  | 1.501585  | -0.108749 |
| C | -2.463893 | -0.41422  | 0.993458  |
| C | 0.165676  | 2.137272  | 0.976175  |
| H | 0.699443  | 2.21885   | 1.912381  |
| C | -1.220714 | 1.916706  | -1.466466 |
| H | -1.729948 | 1.848235  | -2.419026 |
| C | -0.874471 | 1.227391  | 0.838491  |
| C | -1.447635 | 0.242733  | 1.721963  |
| C | 4.236644  | 0.805951  | 1.092933  |
| C | 3.845215  | 2.951417  | -0.102782 |
| C | 3.944179  | 0.755553  | -1.292811 |
| C | 3.961912  | -0.625517 | -1.26985  |
| C | -3.186285 | -1.464985 | 1.553747  |
| H | -3.961714 | -1.97671  | 1.002855  |
| C | -1.175142 | -0.139741 | 3.031264  |
| H | -0.404832 | 0.367632  | 3.59844   |
| C | -2.889126 | -1.831026 | 2.857226  |
| H | -3.448318 | -2.638028 | 3.313973  |
| C | 4.250684  | -0.57356  | 1.128177  |
| C | -1.899091 | -1.176977 | 3.595283  |
| H | -1.70192  | -1.480423 | 4.615197  |

|   |           |           |           |   |           |           |           |
|---|-----------|-----------|-----------|---|-----------|-----------|-----------|
| B | -2.72116  | -3.812224 | 1.398916  | B | 2.906009  | 3.631253  | 1.159779  |
| H | -2.439838 | -3.114793 | 2.305162  | H | 2.668142  | 2.937421  | 2.095405  |
| B | -4.390124 | -4.103904 | 0.907988  | B | 4.668745  | 4.009135  | 0.812535  |
| H | -5.250951 | -3.563751 | 1.51428   | H | 5.547793  | 3.571456  | 1.483726  |
| B | -1.770675 | -5.227697 | -0.860642 | B | 1.900708  | 5.195315  | -0.890438 |
| H | -0.79658  | -5.493068 | -1.477065 | H | 0.993603  | 5.555899  | -1.568466 |
| B | -4.428616 | -4.158828 | -0.853971 | B | 4.650626  | 4.065745  | -0.974068 |
| H | -5.312022 | -3.650623 | -1.455257 | H | 5.512545  | 3.668876  | -1.690475 |
| B | -1.732228 | -5.178451 | 0.897296  | B | 1.922226  | 5.146751  | 0.895867  |
| H | -0.72948  | -5.384188 | 1.490218  | H | 1.029381  | 5.450998  | 1.617349  |
| B | -3.380698 | -5.437214 | 1.487296  | B | 3.605411  | 5.286251  | 1.40243   |
| H | -3.578892 | -5.933287 | 2.545681  | H | 3.837476  | 5.766376  | 2.464433  |
| B | -2.779441 | -3.892594 | -1.418573 | B | 2.883248  | 3.703407  | -1.291941 |
| H | -2.494117 | -3.243793 | -2.360459 | H | 2.575141  | 3.070541  | -2.250579 |
| B | -4.437535 | -5.665265 | 0.077038  | B | 4.638682  | 5.568081  | -0.027555 |
| H | -5.410776 | -6.341424 | 0.11854   | H | 5.595133  | 6.273814  | -0.014553 |
| B | -3.435129 | -5.521793 | -1.383007 | B | 3.568662  | 5.372119  | -1.445928 |
| H | -3.662619 | -6.086563 | -2.400376 | H | 3.759341  | 5.925666  | -2.480145 |
| B | -2.795484 | -6.326919 | 0.067515  | B | 3.015246  | 6.238448  | 0.014161  |
| H | -2.56118  | -7.489081 | 0.093456  | H | 2.8348    | 7.412875  | 0.048006  |
| H | -3.826748 | -1.464136 | 2.085603  | H | 4.346814  | 1.366358  | 2.010364  |
| H | -4.073928 | 0.963917  | 2.089055  | H | 4.369418  | -1.100901 | 2.066277  |
| H | -3.653462 | 1.010491  | -2.16758  | H | 3.845339  | -1.192913 | -2.184543 |
| H | -3.40891  | -1.413636 | -2.170683 | H | 3.820347  | 1.274055  | -2.232384 |
| N | 2.486053  | -0.077838 | -0.307672 | N | -2.548169 | 0.146049  | -0.264622 |
| C | -3.855007 | 1.171286  | -0.03599  | C | 4.085013  | -1.287547 | -0.053304 |
| N | -3.963387 | 2.564794  | -0.022467 | N | 3.969148  | -2.71476  | -0.003943 |
| C | -3.379771 | 3.306459  | 1.028911  | C | 2.884137  | -3.251642 | 0.665431  |
| C | -4.071255 | 4.372739  | 1.601482  | C | 2.968826  | -4.513207 | 1.288618  |
| C | -2.105172 | 2.988233  | 1.496661  | C | 1.696573  | -2.501381 | 0.777759  |
| C | -3.49054  | 5.110502  | 2.620507  | C | 1.882482  | -5.011966 | 1.973815  |
| H | -5.061091 | 4.618015  | 1.239654  | H | 3.902168  | -5.058002 | 1.270441  |
| C | -1.539699 | 3.719936  | 2.528675  | C | 0.618188  | -3.019826 | 1.461207  |
| H | -1.559972 | 2.166208  | 1.051223  | H | 1.633574  | -1.528289 | 0.313001  |
| C | -2.226007 | 4.786607  | 3.092923  | C | 0.702894  | -4.27549  | 2.058926  |
| H | -4.038056 | 5.936676  | 3.056144  | H | 1.960993  | -5.970011 | 2.469723  |
| H | -0.549144 | 3.456465  | 2.877691  | H | -0.293582 | -2.442888 | 1.537723  |
| H | -1.779157 | 5.361572  | 3.893419  | H | -0.144192 | -4.667573 | 2.60489   |
| C | -4.598071 | 3.24545   | -1.082089 | C | 4.927118  | -3.484505 | -0.641753 |
| C | -4.041193 | 4.411512  | -1.605883 | C | 4.601489  | -4.732699 | -1.203425 |
| C | -5.796339 | 2.765963  | -1.610997 | C | 6.233879  | -2.984354 | -0.77748  |
| C | -4.677366 | 5.084761  | -2.636297 | C | 5.57258   | -5.468864 | -1.84922  |
| H | -3.111657 | 4.785039  | -1.197289 | H | 3.580724  | -5.086046 | -1.166075 |
| C | -6.414752 | 3.435615  | -2.654182 | C | 7.192499  | -3.738556 | -1.419546 |
| H | -6.236916 | 1.867539  | -1.19913  | H | 6.475936  | -2.018902 | -0.357582 |
| C | -5.86306  | 4.599997  | -3.170555 | C | 6.872378  | -4.983263 | -1.954886 |
| H | -4.233688 | 5.989546  | -3.032046 | H | 5.310719  | -6.418653 | -2.295449 |
| H | -7.343903 | 3.050609  | -3.054739 | H | 8.20013   | -3.355281 | -1.503962 |

|   |           |           |           |   |           |           |           |
|---|-----------|-----------|-----------|---|-----------|-----------|-----------|
| H | -6.353294 | 5.125063  | -3.979665 | H | 7.627936  | -5.564251 | -2.465824 |
| C | 3.412201  | 0.263566  | -1.367518 | C | -3.42767  | -0.261409 | -1.337605 |
| C | 4.835013  | -2.129267 | -0.494396 | C | -4.908547 | 2.144588  | -0.617992 |
| C | 5.511654  | -0.876827 | -0.577912 | C | -5.567098 | 0.880654  | -0.667084 |
| C | 5.48715   | -3.262274 | -0.113724 | C | -5.586545 | 3.283345  | -0.305925 |
| C | 4.870676  | 0.311939  | -0.973496 | C | -4.898709 | -0.314822 | -0.991712 |
| C | 6.906299  | -0.860293 | -0.25184  | C | -6.97078  | 0.858151  | -0.382194 |
| C | 6.864096  | -3.234739 | 0.217275  | C | -6.972495 | 3.250464  | -0.015208 |
| H | 4.944899  | -4.197422 | -0.059222 | H | -5.057495 | 4.226989  | -0.275298 |
| C | 5.600953  | 1.511937  | -1.064453 | C | -5.611145 | -1.527178 | -1.053198 |
| C | 7.613778  | 0.331197  | -0.343779 | C | -7.659829 | -0.346108 | -0.442711 |
| C | 7.550536  | -2.064149 | 0.147752  | C | -7.642212 | 2.068847  | -0.054435 |
| H | 7.361801  | -4.146138 | 0.521644  | H | -7.490454 | 4.167162  | 0.234748  |
| C | 5.03151   | 2.766095  | -1.447505 | C | -5.01564  | -2.788165 | -1.368693 |
| C | 7.001248  | 1.510504  | -0.743306 | C | -7.020287 | -1.532371 | -0.773172 |
| H | 8.670314  | 0.340136  | -0.101134 | H | -8.722918 | -0.359679 | -0.230701 |
| H | 8.604998  | -2.024297 | 0.392489  | H | -8.703048 | 2.024887  | 0.16034   |
| C | 5.779683  | 3.901031  | -1.516096 | C | -5.746486 | -3.935632 | -1.412009 |
| H | 3.97916   | 2.836116  | -1.680583 | H | -3.956717 | -2.850575 | -1.572532 |
| C | 7.749545  | 2.718305  | -0.833852 | C | -7.749572 | -2.753591 | -0.834281 |
| C | 7.162995  | 3.883417  | -1.210831 | C | -7.137951 | -3.925189 | -1.145948 |
| H | 5.31045   | 4.832055  | -1.8072   | H | -5.257875 | -4.87091  | -1.654016 |
| H | 8.804474  | 2.683229  | -0.590262 | H | -8.811586 | -2.723266 | -0.622703 |
| H | 7.740797  | 4.795938  | -1.275504 | H | -7.702445 | -4.847316 | -1.189581 |
| H | 3.29226   | -0.494046 | -2.141751 | H | -3.291919 | 0.46151   | -2.141896 |
| H | 3.102565  | 1.202101  | -1.823153 | H | -3.090531 | -1.215239 | -1.740398 |
| H | 3.782242  | -2.19044  | -0.72534  | H | -3.850038 | 2.211407  | -0.819463 |

| CB-Bu at $S_0$ |           |           | CB-Bu at $S_1$ |   |           |           |           |
|----------------|-----------|-----------|----------------|---|-----------|-----------|-----------|
| C              | 0.395018  | -2.05991  | 0.550069       | C | 1.625792  | -1.354286 | 0.613612  |
| C              | -2.322898 | -2.357219 | 0.062745       | C | -0.570265 | -3.055498 | 0.33452   |
| C              | -3.784969 | -2.425786 | -0.249638      | C | -1.744461 | -3.89964  | 0.10687   |
| C              | -1.379107 | -2.463711 | -0.972249      | C | 0.412747  | -2.936921 | -0.67298  |
| H              | -1.719103 | -2.661389 | -1.978066      | H | 0.29291   | -3.520111 | -1.575776 |
| C              | -3.804417 | 0.310686  | -0.384831      | C | -3.886688 | -1.4552   | -0.460929 |
| C              | 1.577341  | -1.575838 | 2.393436       | C | 2.235896  | 0.12295   | 2.194721  |
| C              | -1.88164  | -2.15242  | 1.363901       | C | -0.421905 | -2.301843 | 1.497462  |
| H              | -2.587051 | -2.094877 | 2.179599       | H | -1.165255 | -2.37107  | 2.278852  |
| C              | -0.024817 | -2.316659 | -0.749638      | C | 1.507309  | -2.10798  | -0.551304 |
| H              | 0.681446  | -2.383437 | -1.565493      | H | 2.23772   | -2.035423 | -1.345569 |
| C              | -0.525309 | -1.995583 | 1.61325        | C | 0.663269  | -1.444239 | 1.632558  |
| C              | 0.235208  | -1.695524 | 2.800388       | C | 1.054145  | -0.498815 | 2.650102  |
| C              | -3.576826 | 0.917775  | 0.849316       | C | -4.34133  | -0.765625 | 0.673804  |
| C              | -4.608489 | -0.943653 | -0.498941      | C | -3.773035 | -2.912838 | -0.445284 |
| C              | -3.225384 | 0.892782  | -1.510897      | C | -3.479906 | -0.699433 | -1.569939 |
| C              | -2.384006 | 1.983837  | -1.40435       | C | -3.437197 | 0.680162  | -1.517065 |
| C              | 2.593081  | -1.282379 | 3.29663        | C | 2.890467  | 1.085673  | 2.956813  |
| H              | 3.622066  | -1.202007 | 2.973451       | H | 3.810499  | 1.53948   | 2.614363  |

|   |           |           |           |   |           |           |           |
|---|-----------|-----------|-----------|---|-----------|-----------|-----------|
| C | -0.096087 | -1.511786 | 4.139887  | C | 0.518463  | -0.137764 | 3.882585  |
| H | -1.123484 | -1.601693 | 4.469342  | H | -0.383429 | -0.614129 | 4.245989  |
| C | 2.236351  | -1.102977 | 4.622421  | C | 2.333796  | 1.429532  | 4.178415  |
| H | 3.006179  | -0.876337 | 5.34894   | H | 2.829871  | 2.170885  | 4.79219   |
| C | -2.745064 | 2.013777  | 0.964808  | C | -4.297795 | 0.611939  | 0.739612  |
| C | 0.907469  | -1.21412  | 5.043517  | C | 1.158308  | 0.82996   | 4.639627  |
| H | 0.665296  | -1.068108 | 6.087757  | H | 0.754282  | 1.114854  | 5.602296  |
| B | -4.894654 | -1.854908 | 0.917115  | B | -3.194674 | -3.652522 | 0.98803   |
| H | -4.495549 | -1.45761  | 1.95035   | H | -3.155024 | -2.981598 | 1.96872   |
| B | -6.211806 | -1.071854 | 0.047642  | B | -4.839267 | -3.93824  | 0.223393  |
| H | -6.68928  | -0.099638 | 0.524372  | H | -5.831965 | -3.46487  | 0.676488  |
| B | -4.445523 | -3.627236 | -1.252565 | B | -1.802259 | -5.240575 | -0.80136  |
| H | -3.69548  | -4.440674 | -1.672844 | H | -0.777286 | -5.63791  | -1.252876 |
| B | -5.823341 | -1.144441 | -1.669075 | B | -4.398892 | -3.97492  | -1.50847  |
| H | -6.03476  | -0.221738 | -2.37954  | H | -5.046532 | -3.526925 | -2.399231 |
| B | -4.834145 | -3.556281 | 0.463964  | B | -2.246344 | -5.211081 | 0.929981  |
| H | -4.351222 | -4.317676 | 1.230268  | H | -1.565635 | -5.567333 | 1.835477  |
| B | -6.390268 | -2.729772 | 0.64458   | B | -4.006323 | -5.273338 | 1.019296  |
| H | -7.104275 | -2.972381 | 1.559431  | H | -4.506023 | -5.753648 | 1.984625  |
| B | -4.273525 | -1.96889  | -1.823778 | B | -2.592039 | -3.697912 | -1.390524 |
| H | -3.449054 | -1.638244 | -2.596553 | H | -2.03679  | -3.070392 | -2.234321 |
| B | -6.97204  | -2.300196 | -0.977594 | B | -4.681048 | -5.486694 | -0.621045 |
| H | -8.126192 | -2.23487  | -1.241843 | H | -5.64428  | -6.144103 | -0.851402 |
| B | -5.755862 | -2.846501 | -2.152172 | B | -3.296617 | -5.328289 | -1.74027  |
| H | -6.012151 | -3.174874 | -3.262251 | H | -3.260799 | -5.860048 | -2.802489 |
| B | -6.121712 | -3.833209 | -0.720714 | B | -3.14645  | -6.237468 | -0.210624 |
| H | -6.653222 | -4.890469 | -0.797263 | H | -3.032738 | -7.419687 | -0.161792 |
| H | -4.056424 | 0.533799  | 1.737564  | H | -4.696618 | -1.331653 | 1.523071  |
| H | -2.572023 | 2.458535  | 1.935154  | H | -4.615193 | 1.132499  | 1.634311  |
| H | -1.920742 | 2.393507  | -2.291283 | H | -3.075429 | 1.252411  | -2.361929 |
| H | -3.410459 | 0.473547  | -2.489358 | H | -3.156586 | -1.21124  | -2.464604 |
| N | 1.662423  | -1.81088  | 1.031285  | N | 2.576818  | -0.406575 | 0.963117  |
| C | -2.09819  | 2.538139  | -0.155825 | C | -3.818185 | 1.33216   | -0.349155 |
| N | -1.177375 | 3.58398   | -0.019635 | N | -3.651345 | 2.7499    | -0.238189 |
| C | -0.282171 | 3.597191  | 1.071057  | C | -2.75006  | 3.223643  | 0.69919   |
| C | 0.070547  | 4.805364  | 1.67181   | C | -2.936162 | 4.478371  | 1.313023  |
| C | 0.264744  | 2.40973   | 1.561166  | C | -1.663552 | 2.415663  | 1.08837   |
| C | 0.95771   | 4.821961  | 2.735997  | C | -2.039595 | 4.914314  | 2.264315  |
| H | -0.354634 | 5.72748   | 1.298314  | H | -3.809073 | 5.06842   | 1.071765  |
| C | 1.130856  | 2.433823  | 2.643769  | C | -0.773802 | 2.871367  | 2.03721   |
| H | -0.003582 | 1.466918  | 1.102617  | H | -1.52509  | 1.44834   | 0.627765  |
| C | 1.488459  | 3.63949   | 3.232486  | C | -0.953759 | 4.120493  | 2.626967  |
| H | 1.221008  | 5.768605  | 3.190703  | H | -2.200142 | 5.868131  | 2.748486  |
| H | 1.526388  | 1.50038   | 3.026219  | H | 0.062199  | 2.248928  | 2.326796  |
| H | 2.16859   | 3.656099  | 4.073905  | H | -0.257972 | 4.463939  | 3.380201  |
| C | -1.057585 | 4.556918  | -1.034647 | C | -4.375065 | 3.575525  | -1.081686 |
| C | -2.19958  | 5.143495  | -1.578874 | C | -3.855935 | 4.810118  | -1.512555 |
| C | 0.196949  | 4.944316  | -1.503427 | C | -5.626736 | 3.147185  | -1.557186 |

|   |           |           |           |   |           |           |           |
|---|-----------|-----------|-----------|---|-----------|-----------|-----------|
| C | -2.085084 | 6.091738  | -2.582347 | C | -4.592081 | 5.60288   | -2.367867 |
| H | -3.173436 | 4.849316  | -1.209895 | H | -2.863052 | 5.108562  | -1.207069 |
| C | 0.302275  | 5.907653  | -2.49382  | C | -6.350844 | 3.957213  | -2.405505 |
| H | 1.084358  | 4.487981  | -1.084939 | H | -6.015627 | 2.192469  | -1.234176 |
| C | -0.835325 | 6.483255  | -3.042415 | C | -5.843605 | 5.187975  | -2.813076 |
| H | -2.980543 | 6.537727  | -2.99607  | H | -4.178683 | 6.54178   | -2.710462 |
| H | 1.2828    | 6.199761  | -2.847842 | H | -7.320994 | 3.629076  | -2.752636 |
| H | -0.748955 | 7.230398  | -3.820254 | H | -6.413729 | 5.813227  | -3.486502 |
| C | 2.818259  | -1.623295 | 0.236766  | C | 3.724953  | -0.079676 | 0.212399  |
| C | 3.325262  | -2.676939 | -0.5073   | C | 4.593645  | -1.085601 | -0.18747  |
| C | 3.420718  | -0.37427  | 0.201639  | C | 3.980324  | 1.242512  | -0.124305 |
| C | 4.446332  | -2.491882 | -1.312997 | C | 5.725922  | -0.785114 | -0.938363 |
| H | 2.836498  | -3.640337 | -0.440099 | H | 4.373823  | -2.103514 | 0.106495  |
| C | 4.552328  | -0.160814 | -0.578657 | C | 5.116867  | 1.579424  | -0.853545 |
| H | 2.982145  | 0.428516  | 0.780677  | H | 3.271145  | 2.000353  | 0.182173  |
| C | 5.041611  | -1.231362 | -1.326815 | C | 5.96909   | 0.551315  | -1.252585 |
| H | 5.914273  | -1.077592 | -1.941895 | H | 6.848592  | 0.797817  | -1.826001 |
| C | 5.193162  | 1.224947  | -0.600112 | C | 5.376265  | 3.043899  | -1.201358 |
| C | 4.173098  | 2.246206  | -1.116442 | C | 4.216423  | 3.577456  | -2.048686 |
| H | 3.847687  | 1.995203  | -2.127299 | H | 4.121058  | 3.012584  | -2.977257 |
| H | 3.288366  | 2.293578  | -0.480116 | H | 3.264969  | 3.512092  | -1.519645 |
| H | 4.619174  | 3.242879  | -1.139832 | H | 4.385268  | 4.626084  | -2.303583 |
| C | 6.424693  | 1.280631  | -1.499348 | C | 6.669014  | 3.234789  | -1.989603 |
| H | 6.84679   | 2.286406  | -1.476593 | H | 6.810835  | 4.294811  | -2.206084 |
| H | 7.202082  | 0.590103  | -1.167134 | H | 7.540672  | 2.893716  | -1.428364 |
| H | 6.180461  | 1.050846  | -2.538054 | H | 6.645062  | 2.705163  | -2.943503 |
| C | 5.617679  | 1.608454  | 0.821475  | C | 5.479702  | 3.860756  | 0.090837  |
| H | 6.339693  | 0.893521  | 1.219754  | H | 6.300402  | 3.501519  | 0.713868  |
| H | 6.082651  | 2.596523  | 0.82205   | H | 5.663287  | 4.91255   | -0.139291 |
| H | 4.766687  | 1.644574  | 1.502695  | H | 4.563211  | 3.805222  | 0.67978   |
| C | 4.98227   | -3.664524 | -2.131255 | C | 6.657234  | -1.915143 | -1.371494 |
| C | 6.204806  | -3.283354 | -2.961292 | C | 7.841958  | -1.409975 | -2.190159 |
| H | 6.5442    | -4.151323 | -3.528456 | H | 8.470946  | -2.25369  | -2.477833 |
| H | 5.979237  | -2.49067  | -3.67695  | H | 7.520116  | -0.912493 | -3.106935 |
| H | 7.036044  | -2.955816 | -2.334348 | H | 8.463689  | -0.716404 | -1.621001 |
| C | 3.889436  | -4.155762 | -3.086513 | C | 5.873402  | -2.91454  | -2.228759 |
| H | 3.001704  | -4.492424 | -2.549749 | H | 5.037444  | -3.351659 | -1.681728 |
| H | 3.586623  | -3.363541 | -3.77327  | H | 5.474054  | -2.432803 | -3.122848 |
| H | 4.255756  | -4.996657 | -3.679028 | H | 6.524221  | -3.731995 | -2.545854 |
| C | 5.380506  | -4.802582 | -1.185605 | C | 7.202177  | -2.627856 | -0.129287 |
| H | 6.159941  | -4.479828 | -0.493614 | H | 7.766158  | -1.937865 | 0.500423  |
| H | 4.534422  | -5.154987 | -0.594837 | H | 6.403443  | -3.056438 | 0.476571  |
| H | 5.762813  | -5.651189 | -1.756726 | H | 7.868093  | -3.441709 | -0.423688 |

**CB-Cz at S<sub>0</sub>**

|   |          |          |          |
|---|----------|----------|----------|
| C | 0.275314 | 1.744887 | 1.312693 |
| C | 2.812995 | 2.758145 | 0.808586 |
| C | 4.167698 | 3.33683  | 0.538062 |

**CB-Cz at S<sub>1</sub>**

|   |           |          |          |
|---|-----------|----------|----------|
| C | -0.384729 | 1.878712 | 1.24574  |
| C | 1.923126  | 3.353921 | 0.726745 |
| C | 3.137772  | 4.110118 | 0.424938 |

|   |           |           |           |   |           |           |           |
|---|-----------|-----------|-----------|---|-----------|-----------|-----------|
| C | 1.935779  | 2.437364  | -0.237579 | C | 1.003543  | 3.036431  | -0.292911 |
| H | 2.246442  | 2.594154  | -1.258902 | H | 1.209169  | 3.381259  | -1.296892 |
| C | 5.110008  | 0.855842  | -0.194478 | C | 5.284625  | 1.616135  | -0.30062  |
| C | -0.825375 | 1.233484  | 3.209156  | C | -1.198502 | 0.900356  | 3.110533  |
| C | 2.402451  | 2.562852  | 2.122047  | C | 1.655304  | 2.920589  | 2.025071  |
| H | 3.060335  | 2.813028  | 2.942403  | H | 2.348529  | 3.157545  | 2.820627  |
| C | 0.672883  | 1.926794  | -0.005879 | C | -0.143623 | 2.305153  | -0.055669 |
| H | 0.022663  | 1.680812  | -0.833662 | H | -0.82265  | 2.072318  | -0.864734 |
| C | 1.137941  | 2.054347  | 2.379786  | C | 0.509452  | 2.182831  | 2.285401  |
| C | 0.433124  | 1.72853   | 3.594063  | C | -0.014938 | 1.565155  | 3.479781  |
| C | 5.025251  | -0.056097 | 0.855449  | C | 5.577841  | 0.811963  | 0.808643  |
| C | 5.420799  | 2.299349  | 0.035455  | C | 5.145784  | 3.0673    | -0.172435 |
| C | 4.925194  | 0.374155  | -1.489663 | C | 5.116523  | 0.987697  | -1.543116 |
| C | 4.632773  | -0.954327 | -1.728628 | C | 5.207381  | -0.384244 | -1.669948 |
| C | -1.778319 | 0.855225  | 4.147084  | C | -1.974308 | 0.220734  | 4.041981  |
| H | -2.754036 | 0.497183  | 3.849098  | H | -2.89724  | -0.267728 | 3.760252  |
| C | 0.752278  | 1.826757  | 4.944876  | C | 0.407045  | 1.531709  | 4.804436  |
| H | 1.717339  | 2.207083  | 5.254728  | H | 1.313199  | 2.04419   | 5.101673  |
| C | -1.436747 | 0.962463  | 5.48437   | C | -1.531328 | 0.200797  | 5.354422  |
| H | -2.160017 | 0.673115  | 6.235711  | H | -2.118255 | -0.321168 | 6.099305  |
| C | 4.743349  | -1.388646 | 0.626304  | C | 5.660854  | -0.563117 | 0.696298  |
| C | -0.185219 | 1.437986  | 5.883827  | C | -0.352311 | 0.844561  | 5.735457  |
| H | 0.04758   | 1.507266  | 6.938001  | H | -0.036271 | 0.812037  | 6.769789  |
| B | 5.420324  | 2.914371  | 1.625477  | B | 4.604453  | 3.77896   | 1.274101  |
| H | 5.161345  | 2.193801  | 2.520914  | H | 4.533856  | 3.088795  | 2.240932  |
| B | 6.908017  | 2.81669   | 0.687229  | B | 6.251585  | 4.050484  | 0.502075  |
| H | 7.685358  | 1.969581  | 0.966555  | H | 7.237417  | 3.536792  | 0.924841  |
| B | 4.377039  | 4.883432  | -0.147017 | B | 3.22954   | 5.46672   | -0.457439 |
| H | 3.391534  | 5.47726   | -0.422382 | H | 2.207487  | 5.897982  | -0.882867 |
| B | 6.484148  | 3.134257  | -0.992811 | B | 5.776486  | 4.138902  | -1.218423 |
| H | 6.980453  | 2.511444  | -1.867913 | H | 6.395361  | 3.69462   | -2.132225 |
| B | 4.798247  | 4.562201  | 1.532443  | B | 3.703548  | 5.374297  | 1.267801  |
| H | 4.106648  | 4.948889  | 2.411078  | H | 3.05064   | 5.731363  | 2.193949  |
| B | 6.540116  | 4.267327  | 1.629606  | B | 5.464168  | 5.383165  | 1.336662  |
| H | 7.146045  | 4.525255  | 2.615475  | H | 5.984358  | 5.831103  | 2.306853  |
| B | 4.746302  | 3.425386  | -1.063275 | B | 3.959107  | 3.901287  | -1.073416 |
| H | 4.077622  | 3.019594  | -1.943936 | H | 3.396711  | 3.294627  | -1.92895  |
| B | 7.203348  | 4.417319  | -0.011139 | B | 6.118453  | 5.62078   | -0.309956 |
| H | 8.31041   | 4.786845  | -0.22057  | H | 7.096356  | 6.254229  | -0.546233 |
| B | 5.856885  | 4.784727  | -1.111585 | B | 4.71139   | 5.525046  | -1.408878 |
| H | 5.976483  | 5.409958  | -2.111678 | H | 4.681505  | 6.076769  | -2.461121 |
| B | 5.901842  | 5.496107  | 0.514985  | B | 4.615734  | 6.404008  | 0.142588  |
| H | 6.053281  | 6.657505  | 0.699761  | H | 4.53703   | 7.587163  | 0.226391  |
| H | 5.197759  | 0.2686    | 1.87066   | H | 5.72605   | 1.280076  | 1.77111   |
| H | 4.69096   | -2.07555  | 1.459586  | H | 5.873978  | -1.175533 | 1.563374  |
| H | 4.479595  | -1.295892 | -2.742932 | H | 5.064559  | -0.860005 | -2.632025 |
| H | 5.003589  | 1.04876   | -2.330678 | H | 4.906411  | 1.594236  | -2.412527 |
| N | -0.909785 | 1.245986  | 1.820975  | N | -1.418749 | 1.097571  | 1.752983  |



|   |           |           |           |   |           |           |           |
|---|-----------|-----------|-----------|---|-----------|-----------|-----------|
| C | 4.525931  | -1.859851 | -0.670407 | C | 5.468115  | -1.157242 | -0.544318 |
| N | 4.213751  | -3.202536 | -0.902249 | N | 5.522946  | -2.587015 | -0.664215 |
| C | 3.440282  | -3.92982  | 0.026426  | C | 4.517978  | -3.333834 | -0.076709 |
| C | 3.768818  | -5.250693 | 0.329241  | C | 4.760068  | -4.642328 | 0.386143  |
| C | 2.333032  | -3.345505 | 0.642207  | C | 3.24604   | -2.758678 | 0.106199  |
| C | 2.998674  | -5.97257  | 1.226684  | C | 3.740266  | -5.363599 | 0.968827  |
| H | 4.628319  | -5.704959 | -0.145524 | H | 5.756812  | -5.05585  | 0.324819  |
| C | 1.581917  | -4.068554 | 1.555031  | C | 2.237745  | -3.500034 | 0.682184  |
| H | 2.070912  | -2.322357 | 0.406393  | H | 3.068229  | -1.747593 | -0.229203 |
| C | 1.904656  | -5.387042 | 1.848532  | C | 2.472284  | -4.805369 | 1.108738  |
| H | 3.266713  | -6.997177 | 1.450992  | H | 3.937606  | -6.360632 | 1.338417  |
| H | 0.726297  | -3.603149 | 2.027813  | H | 1.254539  | -3.065826 | 0.798695  |
| H | 1.309771  | -5.949581 | 2.555875  | H | 1.671836  | -5.375633 | 1.559829  |
| C | 4.648732  | -3.840821 | -2.085198 | C | 6.563634  | -3.147441 | -1.380757 |
| C | 5.963628  | -3.692809 | -2.523892 | C | 7.79197   | -2.464855 | -1.460736 |
| C | 3.768492  | -4.63294  | -2.820145 | C | 6.398443  | -4.359892 | -2.07894  |
| C | 6.383181  | -4.317981 | -3.687091 | C | 8.832562  | -3.011189 | -2.179174 |
| H | 6.649934  | -3.085055 | -1.948877 | H | 7.910335  | -1.527119 | -0.93819  |
| C | 4.201986  | -5.269948 | -3.971742 | C | 7.448796  | -4.884628 | -2.80062  |
| H | 2.747621  | -4.746491 | -2.479996 | H | 5.433091  | -4.845603 | -2.086878 |
| C | 5.507978  | -5.112614 | -4.414668 | C | 8.672239  | -4.222037 | -2.848731 |
| H | 7.406518  | -4.193615 | -4.017476 | H | 9.77948   | -2.490911 | -2.219853 |
| H | 3.508438  | -5.883047 | -4.533002 | H | 7.308422  | -5.804364 | -3.351895 |
| H | 5.841216  | -5.60568  | -5.318298 | H | 9.491008  | -4.63792  | -3.41966  |
| C | -2.027304 | 0.849688  | 1.063822  | C | -2.472641 | 0.547199  | 1.011515  |
| C | -2.570447 | 1.722291  | 0.128256  | C | -3.272152 | 1.362377  | 0.217316  |
| C | -2.583508 | -0.408771 | 1.261228  | C | -2.71286  | -0.822045 | 1.068868  |
| C | -3.678898 | 1.330304  | -0.614975 | C | -4.320258 | 0.806773  | -0.509581 |
| H | -2.135533 | 2.700706  | -0.020719 | H | -3.080789 | 2.425305  | 0.168656  |
| C | -3.694526 | -0.792363 | 0.517507  | C | -3.755469 | -1.369825 | 0.333658  |
| H | -2.160089 | -1.083354 | 1.992101  | H | -2.090052 | -1.457314 | 1.683068  |
| C | -4.242863 | 0.073869  | -0.421827 | C | -4.56689  | -0.561848 | -0.452679 |
| H | -5.106743 | -0.227345 | -0.997603 | H | -5.383953 | -0.992911 | -1.014282 |
| C | -3.601957 | -3.271989 | 0.684316  | C | -3.061685 | -3.73731  | 0.063143  |
| C | -5.611051 | -2.295872 | 1.001094  | C | -5.154697 | -3.373959 | 0.805956  |
| C | -2.26616  | -3.538502 | 0.406447  | C | -1.773041 | -3.599805 | -0.440886 |
| C | -4.521557 | -4.30525  | 0.940807  | C | -3.641676 | -5.002708 | 0.276096  |
| C | -6.653211 | -1.392451 | 1.17332   | C | -6.339751 | -2.799732 | 1.250295  |
| C | -5.804464 | -3.681432 | 1.145525  | C | -4.981298 | -4.769197 | 0.753317  |
| C | -1.860739 | -4.862906 | 0.410119  | C | -1.064477 | -4.758273 | -0.71376  |
| H | -1.56527  | -2.745488 | 0.183124  | H | -1.348298 | -2.623096 | -0.631606 |
| C | -4.089104 | -5.627856 | 0.939332  | C | -2.904964 | -6.150397 | -0.000458 |
| C | -7.903821 | -1.905838 | 1.47187   | C | -7.360688 | -3.654119 | 1.62816   |
| H | -6.497845 | -0.326023 | 1.08474   | H | -6.460694 | -1.726304 | 1.30214   |
| C | -7.071608 | -4.171805 | 1.446061  | C | -6.024679 | -5.606018 | 1.139295  |
| C | -2.758552 | -5.89924  | 0.678154  | C | -1.617603 | -6.022387 | -0.490709 |
| H | -0.824171 | -5.094565 | 0.202013  | H | -0.064415 | -4.680018 | -1.121423 |
| H | -4.787244 | -6.431879 | 1.135296  | H | -3.338151 | -7.129997 | 0.15767   |

|   |           |           |           |   |           |           |           |
|---|-----------|-----------|-----------|---|-----------|-----------|-----------|
| C | -8.116847 | -3.280204 | 1.603377  | C | -7.210706 | -5.042781 | 1.572216  |
| H | -8.732805 | -1.2234   | 1.608003  | H | -8.295686 | -3.234324 | 1.976014  |
| H | -7.234145 | -5.236234 | 1.558953  | H | -5.90724  | -6.681745 | 1.10306   |
| H | -2.407753 | -6.922766 | 0.674365  | H | -1.037959 | -6.907488 | -0.718201 |
| H | -9.107997 | -3.646855 | 1.835113  | H | -8.031362 | -5.680021 | 1.873737  |
| C | -4.605954 | 3.523471  | -1.325412 | C | -5.781393 | 2.783847  | -0.874464 |
| C | -4.487835 | 1.904909  | -2.89308  | C | -5.437009 | 1.424164  | -2.641508 |
| C | -4.5731   | 4.253189  | -0.142938 | C | -5.80888  | 3.36582   | 0.38741   |
| C | -5.110647 | 4.073269  | -2.517514 | C | -6.506205 | 3.324409  | -1.951606 |
| C | -4.243943 | 0.731043  | -3.596183 | C | -4.994524 | 0.42849   | -3.504527 |
| C | -5.033209 | 3.040036  | -3.519446 | C | -6.284611 | 2.457123  | -3.0811   |
| C | -5.034757 | 5.557905  | -0.181524 | C | -6.559949 | 4.517943  | 0.545728  |
| H | -4.20824  | 3.821103  | 0.778705  | H | -5.269042 | 2.937285  | 1.220488  |
| C | -5.569075 | 5.387018  | -2.52946  | C | -7.253862 | 4.483236  | -1.766023 |
| C | -4.579291 | 0.706638  | -4.939276 | C | -5.436647 | 0.472601  | -4.815847 |
| H | -3.802141 | -0.132907 | -3.119042 | H | -4.32235  | -0.350233 | -3.171364 |
| C | -5.361232 | 2.989484  | -4.870734 | C | -6.714217 | 2.478849  | -4.404288 |
| C | -5.523998 | 6.124809  | -1.360716 | C | -7.272902 | 5.077132  | -0.517479 |
| H | -5.016779 | 6.148452  | 0.725326  | H | -6.593333 | 4.993411  | 1.517424  |
| H | -5.958933 | 5.822496  | -3.440772 | H | -7.814272 | 4.91069   | -2.587827 |
| C | -5.136439 | 1.819702  | -5.573229 | C | -6.291196 | 1.482208  | -5.264712 |
| H | -4.401802 | -0.196637 | -5.508554 | H | -5.107661 | -0.29247  | -5.507255 |
| H | -5.781953 | 3.856176  | -5.364661 | H | -7.366131 | 3.268885  | -4.754975 |
| H | -5.874471 | 7.148335  | -1.355423 | H | -7.846321 | 5.980727  | -0.358832 |
| H | -5.388219 | 1.765049  | -6.624001 | H | -6.618083 | 1.485769  | -6.296065 |
| N | -4.230579 | 2.206696  | -1.561514 | N | -5.135594 | 1.629742  | -1.301369 |
| N | -4.271483 | -2.055741 | 0.7216    | N | -3.984664 | -2.75862  | 0.387628  |

| CB-CF <sub>3</sub> at S <sub>0</sub> |           |           |           | CB-CF <sub>3</sub> at S <sub>1</sub> |           |           |           |
|--------------------------------------|-----------|-----------|-----------|--------------------------------------|-----------|-----------|-----------|
| C                                    | 1.546746  | -1.204762 | 0.637347  | C                                    | 1.64257   | -1.395591 | 0.639763  |
| C                                    | -0.638243 | -2.888698 | 0.313839  | C                                    | -0.583042 | -3.060057 | 0.380006  |
| C                                    | -1.79439  | -3.814721 | 0.0893    | C                                    | -1.770846 | -3.88681  | 0.164371  |
| C                                    | 0.422636  | -2.884146 | -0.60526  | C                                    | 0.398001  | -2.965811 | -0.63063  |
| H                                    | 0.385962  | -3.549651 | -1.455579 | H                                    | 0.266634  | -3.553597 | -1.52868  |
| C                                    | -3.420644 | -1.643155 | -0.373045 | C                                    | -3.881256 | -1.422318 | -0.455655 |
| C                                    | 2.050616  | 0.38127   | 2.157255  | C                                    | 2.271919  | 0.097088  | 2.212748  |
| C                                    | -0.597378 | -2.025506 | 1.400326  | C                                    | -0.417712 | -2.299344 | 1.536258  |
| H                                    | -1.405474 | -2.001097 | 2.115242  | H                                    | -1.1602   | -2.348019 | 2.319972  |
| C                                    | 1.519095  | -2.057027 | -0.459345 | C                                    | 1.506878  | -2.153081 | -0.519351 |
| H                                    | 2.316251  | -2.072913 | -1.189435 | H                                    | 2.228574  | -2.100421 | -1.323116 |
| C                                    | 0.487564  | -1.174883 | 1.559878  | C                                    | 0.68261   | -1.460292 | 1.660293  |
| C                                    | 0.808147  | -0.159836 | 2.53232   | C                                    | 1.084995  | -0.509205 | 2.669202  |
| C                                    | -3.941751 | -0.943587 | 0.715351  | C                                    | -4.38064  | -0.715033 | 0.647936  |
| C                                    | -3.296437 | -3.131373 | -0.326853 | C                                    | -3.783887 | -2.88279  | -0.415222 |
| C                                    | -3.048933 | -0.910389 | -1.498093 | C                                    | -3.417534 | -0.685489 | -1.553416 |
| C                                    | -3.146161 | 0.46769   | -1.521567 | C                                    | -3.370521 | 0.695529  | -1.5185   |
| C                                    | 2.673408  | 1.37018   | 2.908638  | C                                    | 2.939109  | 1.051909  | 2.972148  |
| H                                    | 3.641314  | 1.766262  | 2.633801  | H                                    | 3.868701  | 1.492778  | 2.638965  |

|   |           |           |           |   |           |           |           |
|---|-----------|-----------|-----------|---|-----------|-----------|-----------|
| C | 0.164674  | 0.315765  | 3.670905  | C | 0.550957  | -0.136133 | 3.89843   |
| H | -0.791645 | -0.092269 | 3.972237  | H | -0.355985 | -0.60185  | 4.262603  |
| C | 2.014322  | 1.826102  | 4.03757   | C | 2.384604  | 1.408645  | 4.191541  |
| H | 2.477804  | 2.595193  | 4.64159   | H | 2.890497  | 2.145143  | 4.802669  |
| C | -4.050153 | 0.432446  | 0.69882   | C | -4.336004 | 0.664203  | 0.69518   |
| C | 0.771814  | 1.310877  | 4.41636   | C | 1.20089   | 0.827376  | 4.651952  |
| H | 0.287885  | 1.685967  | 5.308506  | H | 0.798751  | 1.1216    | 5.61247   |
| B | -3.075374 | -3.854754 | 1.211465  | B | -3.22045  | -3.598088 | 1.035166  |
| H | -3.028912 | -3.166794 | 2.1663    | H | -3.173651 | -2.903123 | 1.999004  |
| B | -4.555958 | -4.092277 | 0.283179  | B | -4.866873 | -3.878133 | 0.271414  |
| H | -5.532615 | -3.526724 | 0.638674  | H | -5.854486 | -3.382278 | 0.711103  |
| B | -1.590367 | -5.29507  | -0.721956 | B | -1.84617  | -5.245244 | -0.715424 |
| H | -0.493817 | -5.589427 | -1.053632 | H | -0.825288 | -5.664848 | -1.155749 |
| B | -4.117126 | -4.142258 | -1.424012 | B | -4.42283  | -3.957727 | -1.457418 |
| H | -4.788912 | -3.604698 | -2.236158 | H | -5.060198 | -3.519962 | -2.360229 |
| B | -2.027703 | -5.250057 | 0.981761  | B | -2.294722 | -5.171588 | 1.014412  |
| H | -1.228733 | -5.487087 | 1.821298  | H | -1.621689 | -5.516756 | 1.929867  |
| B | -3.781623 | -5.457899 | 1.100777  | B | -4.055355 | -5.206989 | 1.099254  |
| H | -4.273746 | -5.949308 | 2.060766  | H | -4.564313 | -5.658815 | 2.073276  |
| B | -2.369782 | -3.927672 | -1.519098 | B | -2.612104 | -3.703416 | -1.338508 |
| H | -1.818702 | -3.28679  | -2.340754 | H | -2.044774 | -3.104939 | -2.19529  |
| B | -4.422746 | -5.649669 | -0.545433 | B | -4.728346 | -5.446551 | -0.538353 |
| H | -5.390636 | -6.294544 | -0.775808 | H | -5.700148 | -6.094835 | -0.757285 |
| B | -3.058927 | -5.535525 | -1.678232 | B | -3.338753 | -5.331446 | -1.656127 |
| H | -3.01884  | -6.090948 | -2.724755 | H | -3.306915 | -5.885689 | -2.706656 |
| B | -2.860076 | -6.362921 | -0.116731 | B | -3.20603  | -6.209713 | -0.10689  |
| H | -2.675974 | -7.531673 | -0.040288 | H | -3.108818 | -7.391835 | -0.032113 |
| H | -4.288445 | -1.483015 | 1.585763  | H | -4.774246 | -1.267123 | 1.489553  |
| H | -4.46136  | 0.950762  | 1.554087  | H | -4.690431 | 1.198757  | 1.567462  |
| H | -2.831392 | 1.012266  | -2.400958 | H | -2.968675 | 1.253874  | -2.354503 |
| H | -2.662043 | -1.416889 | -2.369902 | H | -3.056883 | -1.210986 | -2.425492 |
| N | 2.49154   | -0.261841 | 1.005511  | N | 2.608657  | -0.451097 | 0.982137  |
| C | -3.633998 | 1.16629   | -0.415127 | C | -3.805298 | 1.364567  | -0.381158 |
| N | -3.70689  | 2.56123   | -0.414532 | N | -3.642083 | 2.787071  | -0.287357 |
| C | -3.451578 | 3.281821  | 0.773399  | C | -2.747547 | 3.274244  | 0.648403  |
| C | -4.263227 | 4.358243  | 1.127207  | C | -2.930725 | 4.5429    | 1.234718  |
| C | -2.380194 | 2.934396  | 1.595631  | C | -1.672426 | 2.465772  | 1.068342  |
| C | -4.000678 | 5.076368  | 2.282738  | C | -2.040161 | 4.993097  | 2.184785  |
| H | -5.094866 | 4.626883  | 0.489231  | H | -3.798076 | 5.133133  | 0.974974  |
| C | -2.135927 | 3.647084  | 2.758561  | C | -0.789208 | 2.935682  | 2.015789  |
| H | -1.741143 | 2.105377  | 1.320364  | H | -1.538762 | 1.48684   | 0.632001  |
| C | -2.94079  | 4.723215  | 3.106732  | C | -0.963869 | 4.199728  | 2.575154  |
| H | -4.6384   | 5.910698  | 2.545773  | H | -2.198378 | 5.958133  | 2.64677   |
| H | -1.298385 | 3.363127  | 3.383313  | H | 0.037791  | 2.31253   | 2.328791  |
| H | -2.743096 | 5.283351  | 4.011233  | H | -0.272914 | 4.555574  | 3.326991  |
| C | -3.9782   | 3.267313  | -1.605938 | C | -4.36441  | 3.597367  | -1.144876 |
| C | -3.251167 | 4.412726  | -1.926652 | C | -3.850263 | 4.831202  | -1.586577 |
| C | -4.984164 | 2.834015  | -2.469093 | C | -5.608835 | 3.153378  | -1.627145 |

|   |           |           |           |   |           |           |           |
|---|-----------|-----------|-----------|---|-----------|-----------|-----------|
| C | -3.532031 | 5.11208   | -3.089333 | C | -4.585174 | 5.608593  | -2.456326 |
| H | -2.470248 | 4.749826  | -1.257995 | H | -2.860477 | 5.138834  | -1.280342 |
| C | -5.244553 | 3.52904   | -3.638914 | C | -6.332413 | 3.949229  | -2.488381 |
| H | -5.557608 | 1.951773  | -2.216512 | H | -5.992424 | 2.198491  | -1.298774 |
| C | -4.524559 | 4.673091  | -3.954454 | C | -5.830858 | 5.179709  | -2.905244 |
| H | -2.960115 | 6.000433  | -3.325375 | H | -4.175205 | 6.545507  | -2.808086 |
| H | -6.027686 | 3.180448  | -4.300057 | H | -7.297161 | 3.610278  | -2.839893 |
| H | -4.736309 | 5.21808   | -4.864838 | H | -6.400198 | 5.793033  | -3.590125 |
| C | 3.689022  | 0.005431  | 0.324612  | C | 3.740167  | -0.129643 | 0.224799  |
| C | 4.570726  | -1.029231 | 0.03186   | C | 4.568814  | -1.137976 | -0.260853 |
| C | 3.997217  | 1.30557   | -0.060536 | C | 4.044661  | 1.19903   | -0.052006 |
| C | 5.743254  | -0.759317 | -0.656127 | C | 5.679583  | -0.810711 | -1.020882 |
| H | 4.345156  | -2.036355 | 0.354723  | H | 4.349626  | -2.170993 | -0.028786 |
| C | 5.188377  | 1.56299   | -0.720496 | C | 5.176496  | 1.510722  | -0.789029 |
| H | 3.300264  | 2.106732  | 0.143501  | H | 3.387663  | 1.983998  | 0.295437  |
| C | 6.065622  | 0.535622  | -1.030355 | C | 5.999187  | 0.512745  | -1.284965 |
| H | 6.986932  | 0.740999  | -1.555569 | H | 6.874611  | 0.760461  | -1.867021 |
| C | 5.541815  | 2.979398  | -1.066299 | C | 5.520617  | 2.952164  | -1.013977 |
| C | 6.650986  | -1.894423 | -1.028895 | C | 6.526295  | -1.908226 | -1.595511 |
| F | 6.131834  | 3.592234  | -0.037673 | F | 6.152729  | 3.469728  | 0.042503  |
| F | 4.45794   | 3.690258  | -1.377484 | F | 4.425206  | 3.690361  | -1.210119 |
| F | 6.380932  | 3.038981  | -2.098499 | F | 6.314399  | 3.114505  | -2.070375 |
| F | 7.907628  | -1.485058 | -1.192305 | F | 7.783281  | -1.507787 | -1.785779 |
| F | 6.264836  | -2.46173  | -2.173512 | F | 6.055345  | -2.309848 | -2.777669 |
| F | 6.647724  | -2.847022 | -0.096952 | F | 6.552953  | -2.974568 | -0.797842 |

| CB-TPE at $S_0$ |           |           | CB-TPE at $S_1$ |   |           |           |           |
|-----------------|-----------|-----------|-----------------|---|-----------|-----------|-----------|
| C               | -0.37509  | -0.970471 | 1.524166        | C | 0.335461  | 1.206149  | 1.665343  |
| C               | -2.538136 | -2.641977 | 1.03017         | C | 2.551028  | 2.813771  | 1.12183   |
| C               | -3.673358 | -3.568119 | 0.719789        | C | 3.711175  | 3.620586  | 0.742127  |
| C               | -1.306034 | -2.829457 | 0.381844        | C | 1.346619  | 2.934484  | 0.393729  |
| H               | -1.200824 | -3.641317 | -0.323407       | H | 1.30003   | 3.667733  | -0.399748 |
| C               | -5.018796 | -1.488289 | -0.482443       | C | 5.393058  | 1.212171  | -0.762703 |
| C               | -0.105912 | 0.851562  | 2.809239        | C | -0.010181 | -0.512    | 3.075702  |
| C               | -2.67815  | -1.594709 | 1.930942        | C | 2.616303  | 1.868198  | 2.143811  |
| H               | -3.616629 | -1.423844 | 2.436046        | H | 3.529883  | 1.753446  | 2.70961   |
| C               | -0.21849  | -2.012687 | 0.617532        | C | 0.23937   | 2.15469   | 0.650503  |
| H               | 0.718006  | -2.177527 | 0.102796        | H | -0.664432 | 2.268481  | 0.06732   |
| C               | -1.603519 | -0.750206 | 2.173029        | C | 1.518692  | 1.057516  | 2.406802  |
| C               | -1.43244  | 0.41968   | 2.997047        | C | 1.297954  | -0.041609 | 3.315707  |
| C               | -5.715655 | -0.583796 | 0.318473        | C | 6.040777  | 0.29809   | 0.082534  |
| C               | -5.003135 | -2.943404 | -0.143526       | C | 5.433575  | 2.645302  | -0.474044 |
| C               | -4.36578  | -0.990466 | -1.607729       | C | 4.652982  | 0.701521  | -1.838722 |
| C               | -4.364725 | 0.360555  | -1.897819       | C | 4.486358  | -0.659062 | -2.009113 |
| C               | 0.405799  | 1.953257  | 3.484968        | C | -0.547735 | -1.568984 | 3.803171  |
| H               | 1.431578  | 2.267322  | 3.349781        | H | -1.560144 | -1.908843 | 3.632581  |
| C               | -2.267611 | 1.116942  | 3.865402        | C | 2.078438  | -0.650791 | 4.293242  |
| H               | -3.289779 | 0.795788  | 4.0211          | H | 3.080751  | -0.292943 | 4.492372  |

|   |           |           |           |   |           |           |           |
|---|-----------|-----------|-----------|---|-----------|-----------|-----------|
| C | -0.443748 | 2.6286    | 4.343635  | C | 0.252294  | -2.160764 | 4.767824  |
| H | -0.070527 | 3.489046  | 4.883985  | H | -0.14723  | -2.980461 | 5.351615  |
| C | -5.727222 | 0.766657  | 0.032612  | C | 5.877212  | -1.06298  | -0.075388 |
| C | -1.767881 | 2.22101   | 4.533142  | C | 1.553444  | -1.712478 | 5.011957  |
| H | -2.402433 | 2.768593  | 5.217696  | H | 2.149114  | -2.190569 | 5.778577  |
| B | -5.169789 | -3.367843 | 1.508499  | B | 5.301853  | 3.133973  | 1.162854  |
| H | -5.291432 | -2.513885 | 2.310262  | H | 5.436296  | 2.294595  | 1.994015  |
| B | -6.424087 | -3.743256 | 0.326354  | B | 6.728675  | 3.467515  | 0.056969  |
| H | -7.416861 | -3.099467 | 0.344306  | H | 7.74936   | 2.864168  | 0.151644  |
| B | -3.393703 | -5.178956 | 0.252956  | B | 3.679758  | 5.10237   | 0.086616  |
| H | -2.272767 | -5.556091 | 0.236362  | H | 2.620436  | 5.632082  | -0.011112 |
| B | -5.626747 | -4.124149 | -1.199324 | B | 5.883587  | 3.851694  | -1.470293 |
| H | -6.068406 | -3.734896 | -2.225787 | H | 6.244578  | 3.543482  | -2.560391 |
| B | -4.19025  | -4.804816 | 1.776312  | B | 4.529352  | 4.725114  | 1.613765  |
| H | -3.612467 | -4.898376 | 2.804264  | H | 4.130915  | 4.942332  | 2.711136  |
| B | -5.936983 | -4.947176 | 1.528525  | B | 6.254624  | 4.673598  | 1.252837  |
| H | -6.658366 | -5.23793  | 2.423317  | H | 7.021146  | 4.93691   | 2.121931  |
| B | -3.890788 | -3.969454 | -0.931097 | B | 4.142154  | 3.656211  | -0.935796 |
| H | -3.134635 | -3.507909 | -1.708601 | H | 3.337205  | 3.22903   | -1.699819 |
| B | -6.21314  | -5.43147  | -0.158715 | B | 6.524819  | 5.153116  | -0.446801 |
| H | -7.146384 | -6.086806 | -0.483915 | H | 7.46317   | 5.788462  | -0.805749 |
| B | -4.629534 | -5.562758 | -0.953393 | B | 4.89949   | 5.282502  | -1.178977 |
| H | -4.396935 | -6.306432 | -1.847078 | H | 4.657736  | 6.004597  | -2.091417 |
| B | -4.831283 | -6.085592 | 0.734007  | B | 5.220778  | 5.896317  | 0.46681   |
| H | -4.744071 | -7.22313  | 1.057385  | H | 5.241639  | 7.052868  | 0.740409  |
| H | -6.27535  | -0.940811 | 1.171645  | H | 6.648441  | 0.674194  | 0.893197  |
| H | -6.276739 | 1.447587  | 0.667943  | H | 6.350826  | -1.758866 | 0.605504  |
| H | -3.831327 | 0.722252  | -2.765975 | H | 3.872713  | -1.041881 | -2.814735 |
| H | -3.832885 | -1.661731 | -2.264695 | H | 4.173232  | 1.389175  | -2.519798 |
| N | 0.525183  | -0.000829 | 1.916238  | N | -0.587873 | 0.255821  | 2.080058  |
| C | -5.032533 | 1.26635   | -1.071582 | C | 5.075167  | -1.538776 | -1.107104 |
| N | -5.00948  | 2.639244  | -1.333407 | N | 4.798644  | -2.940741 | -1.195929 |
| C | -4.947782 | 3.558818  | -0.262638 | C | 4.116281  | -3.533323 | -0.147614 |
| C | -5.735962 | 4.708291  | -0.280671 | C | 4.322495  | -4.889283 | 0.175599  |
| C | -4.092233 | 3.333279  | 0.815209  | C | 3.247183  | -2.756409 | 0.643342  |
| C | -5.661577 | 5.618276  | 0.761592  | C | 3.651443  | -5.448356 | 1.241427  |
| H | -6.400904 | 4.881796  | -1.116502 | H | 5.044159  | -5.468992 | -0.382514 |
| C | -4.03771  | 4.239765  | 1.86187   | C | 2.580012  | -3.334753 | 1.701678  |
| H | -3.471835 | 2.446537  | 0.830753  | H | 3.095992  | -1.713694 | 0.404696  |
| C | -4.817556 | 5.388025  | 1.839444  | C | 2.774757  | -4.680423 | 2.004544  |
| H | -6.278616 | 6.507465  | 0.735114  | H | 3.830729  | -6.483582 | 1.498575  |
| H | -3.366646 | 4.046799  | 2.689436  | H | 1.908305  | -2.734703 | 2.300749  |
| H | -4.767414 | 6.098452  | 2.654201  | H | 2.256652  | -5.12221  | 2.844679  |
| C | -4.981561 | 3.117492  | -2.659789 | C | 5.199405  | -3.630819 | -2.327447 |
| C | -4.139059 | 4.171209  | -3.011985 | C | 4.464331  | -4.730679 | -2.806255 |
| C | -5.804847 | 2.549723  | -3.632083 | C | 6.329394  | -3.19118  | -3.038707 |
| C | -4.12748  | 4.648265  | -4.312734 | C | 4.876881  | -5.387712 | -3.94646  |
| H | -3.499085 | 4.612574  | -2.259581 | H | 3.554313  | -5.02557  | -2.303121 |

|   |           |           |           |   |            |           |           |
|---|-----------|-----------|-----------|---|------------|-----------|-----------|
| C | -5.771894 | 3.021006  | -4.934367 | C | 6.730239   | -3.865647 | -4.172167 |
| H | -6.468002 | 1.739314  | -3.35937  | H | 6.883315   | -2.338047 | -2.674791 |
| C | -4.937785 | 4.074526  | -5.282503 | C | 6.012891   | -4.966945 | -4.631289 |
| H | -3.468831 | 5.467725  | -4.57111  | H | 4.296243   | -6.220445 | -4.319595 |
| H | -6.416134 | 2.56956   | -5.678114 | H | 7.611064   | -3.532697 | -4.703841 |
| H | -4.920986 | 4.445564  | -6.298738 | H | 6.328617   | -5.484687 | -5.526693 |
| C | 1.858725  | 0.103545  | 1.470681  | C | -1.895312  | 0.118976  | 1.578101  |
| C | 2.728193  | -0.971951 | 1.620395  | C | -2.747666  | 1.21811   | 1.556234  |
| C | 2.31158   | 1.277827  | 0.878879  | C | -2.340924  | -1.107562 | 1.097186  |
| C | 4.026219  | -0.882482 | 1.151164  | C | -4.019684  | 1.096498  | 1.026863  |
| H | 2.383018  | -1.871101 | 2.11377   | H | -2.410238  | 2.161861  | 1.964293  |
| C | 3.621509  | 1.368903  | 0.440845  | C | -3.62657   | -1.227044 | 0.598267  |
| H | 1.630697  | 2.109732  | 0.754649  | H | -1.672832  | -1.958839 | 1.106218  |
| C | 4.494075  | 0.283179  | 0.541758  | C | -4.479116  | -0.123236 | 0.526662  |
| H | 4.694568  | -1.725351 | 1.263865  | H | -4.67439   | 1.95716   | 1.005878  |
| H | 3.971448  | 2.28899   | -0.009474 | H | -3.971576  | -2.186634 | 0.235003  |
| C | 5.890595  | 0.391768  | 0.052773  | C | -5.848797  | -0.264527 | -0.025767 |
| C | 6.469898  | -0.573012 | -0.704156 | C | -6.364251  | 0.617183  | -0.918082 |
| C | 6.5941    | 1.637484  | 0.449276  | C | -6.60037   | -1.445954 | 0.467499  |
| C | 7.283935  | 2.407977  | -0.488264 | C | -7.254663  | -2.30684  | -0.415275 |
| C | 6.532398  | 2.092978  | 1.768141  | C | -6.621141  | -1.749809 | 1.830557  |
| C | 7.91003   | 3.586047  | -0.114042 | C | -7.926244  | -3.424815 | 0.052695  |
| H | 7.32674   | 2.074273  | -1.51669  | H | -7.233642  | -2.091324 | -1.475445 |
| C | 7.168596  | 3.265202  | 2.145017  | C | -7.302823  | -2.861516 | 2.299927  |
| H | 5.984218  | 1.515505  | 2.502288  | H | -6.101378  | -1.101509 | 2.525181  |
| C | 7.859894  | 4.016455  | 1.204684  | C | -7.957998  | -3.703582 | 1.412137  |
| H | 8.436753  | 4.171797  | -0.856638 | H | -8.424306  | -4.082635 | -0.648159 |
| H | 7.120987  | 3.59483   | 3.175205  | H | -7.319054  | -3.072859 | 3.361661  |
| H | 8.351165  | 4.935849  | 1.496532  | H | -8.484751  | -4.576059 | 1.776999  |
| C | 5.694282  | -1.689421 | -1.302253 | C | -5.532505  | 1.646146  | -1.592697 |
| C | 4.521126  | -1.45184  | -2.020584 | C | -4.327286  | 1.31011   | -2.211784 |
| C | 6.154585  | -3.003693 | -1.19638  | C | -5.968723  | 2.971048  | -1.661584 |
| C | 3.815981  | -2.498637 | -2.593154 | C | -3.568828  | 2.273928  | -2.857266 |
| H | 4.16549   | -0.435512 | -2.129131 | H | -3.988813  | 0.28254   | -2.184995 |
| C | 5.442588  | -4.052028 | -1.757525 | C | -5.204017  | 3.937581  | -2.295514 |
| H | 7.077165  | -3.199211 | -0.664152 | H | -6.914534  | 3.240227  | -1.208117 |
| C | 4.269721  | -3.803548 | -2.4573   | C | -4.000345  | 3.592829  | -2.894984 |
| H | 2.91247   | -2.2934   | -3.15344  | H | -2.64073   | 1.992211  | -3.33856  |
| H | 5.807817  | -5.065787 | -1.65287  | H | -5.55191   | 4.962309  | -2.326423 |
| H | 3.71797   | -4.621334 | -2.902941 | H | -3.407036  | 4.345964  | -3.39755  |
| C | 7.924013  | -0.595669 | -1.00028  | C | -7.799092  | 0.629062  | -1.297217 |
| C | 8.872044  | -0.420028 | 0.009257  | C | -8.804684  | 0.584076  | -0.329985 |
| C | 8.373365  | -0.849586 | -2.298107 | C | -8.170907  | 0.741175  | -2.638832 |
| C | 10.227085 | -0.475068 | -0.274372 | C | -10.140593 | 0.627978  | -0.69472  |
| H | 8.537791  | -0.240239 | 1.022518  | H | -8.530529  | 0.515139  | 0.714445  |
| C | 9.728731  | -0.891528 | -2.584093 | C | -9.5073    | 0.771804  | -3.004452 |
| H | 7.648814  | -1.011582 | -3.086362 | H | -7.400835  | 0.80124   | -3.397741 |
| C | 10.660872 | -0.704432 | -1.572846 | C | -10.497377 | 0.71538   | -2.033331 |

|   |           |           |           |   |            |          |           |
|---|-----------|-----------|-----------|---|------------|----------|-----------|
| H | 10.946998 | -0.341769 | 0.523091  | H | -10.905904 | 0.597393 | 0.070363  |
| H | 10.057713 | -1.076982 | -3.598736 | H | -9.775992  | 0.846127 | -4.050589 |
| H | 11.719784 | -0.745393 | -1.793932 | H | -11.541414 | 0.747713 | -2.317573 |

**Table S3.** Coordinates of the optimized  $S_1$  structure of **CB-CF<sub>3</sub>** in the ONIOM model

|   |           |           |           |
|---|-----------|-----------|-----------|
| N | 4.382002  | -2.549639 | -0.037041 |
| N | -3.369589 | 0.9791    | 0.983044  |
| C | 1.174016  | 3.950731  | -0.470938 |
| C | 3.337028  | 2.972934  | -0.68913  |
| C | 3.621668  | 1.53609   | -0.55205  |
| C | 2.822834  | 0.565926  | -1.203739 |
| H | 1.970469  | 0.888011  | -1.789796 |
| C | 3.118061  | -0.776692 | -1.107053 |
| H | 2.501434  | -1.522251 | -1.602131 |
| C | 4.170141  | -1.18426  | -0.258812 |
| C | 4.961609  | -0.245909 | 0.430634  |
| H | 5.792296  | -0.581439 | 1.04841   |
| C | 4.707059  | 1.093261  | 0.244767  |
| H | 5.336852  | 1.821753  | 0.737209  |
| C | 4.529415  | -3.003925 | 1.262547  |
| C | 3.848826  | -2.332348 | 2.30897   |
| H | 3.171261  | -1.519871 | 2.07221   |
| C | 4.007247  | -2.773391 | 3.604437  |
| H | 3.481023  | -2.27655  | 4.411264  |
| C | 4.851682  | -3.856527 | 3.881312  |
| H | 4.994475  | -4.179216 | 4.907184  |
| C | 5.526188  | -4.518911 | 2.847369  |
| H | 6.2141    | -5.324645 | 3.075311  |
| C | 5.36238   | -4.113905 | 1.538271  |
| H | 5.913015  | -4.580659 | 0.729043  |
| C | 4.403911  | -3.413876 | -1.140296 |
| C | 3.727459  | -4.646554 | -1.081038 |
| H | 3.181494  | -4.929494 | -0.185375 |
| C | 3.697319  | -5.442936 | -2.213765 |
| H | 3.134972  | -6.370221 | -2.193006 |
| C | 4.378427  | -5.04972  | -3.373024 |
| H | 4.372753  | -5.694851 | -4.247129 |
| C | 5.07462   | -3.836051 | -3.415553 |
| H | 5.628029  | -3.553342 | -4.306614 |
| C | 5.072466  | -2.999282 | -2.311078 |
| H | 5.632679  | -2.070012 | -2.30446  |
| C | -0.017633 | 3.175403  | -0.155841 |
| C | -0.489193 | 3.114086  | 1.163984  |
| H | 0.035966  | 3.65271   | 1.947977  |
| C | -1.626814 | 2.373015  | 1.453015  |
| C | -2.293459 | 1.668186  | 0.427129  |
| C | -1.836272 | 1.704356  | -0.893123 |

|   |           |           |           |
|---|-----------|-----------|-----------|
| H | -2.335016 | 1.160068  | -1.688743 |
| C | -0.713163 | 2.465715  | -1.166363 |
| H | -0.355374 | 2.53122   | -2.188708 |
| C | -2.349557 | 2.110374  | 2.681071  |
| C | -2.191199 | 2.547107  | 3.997675  |
| H | -1.367869 | 3.20619   | 4.263145  |
| C | -3.107856 | 2.134616  | 4.956568  |
| H | -3.009104 | 2.478721  | 5.981785  |
| C | -4.175136 | 1.288782  | 4.611512  |
| H | -4.891439 | 0.998377  | 5.374035  |
| C | -4.340624 | 0.826864  | 3.310849  |
| H | -5.177181 | 0.185857  | 3.049233  |
| C | -3.412833 | 1.244296  | 2.354972  |
| C | -4.142695 | 0.021448  | 0.301731  |
| C | -4.79567  | 0.363399  | -0.884647 |
| H | -4.73337  | 1.384068  | -1.24947  |
| C | -5.530944 | -0.600547 | -1.567336 |
| C | -5.626012 | -1.903737 | -1.088306 |
| H | -6.199935 | -2.649547 | -1.627829 |
| C | -4.958743 | -2.232446 | 0.088671  |
| C | -4.222824 | -1.28352  | 0.790838  |
| H | -3.679937 | -1.553287 | 1.694107  |
| C | -4.910359 | -3.662014 | 0.554851  |
| C | -6.18678  | -0.238324 | -2.872811 |
| B | 2.603368  | 3.820988  | 0.569497  |
| H | 2.463615  | 3.248887  | 1.603548  |
| B | 4.31572   | 4.129804  | -0.079129 |
| H | 5.30323   | 3.806603  | 0.493877  |
| B | 3.35745   | 5.486414  | 0.469167  |
| H | 3.73558   | 6.103583  | 1.41176   |
| B | 4.154882  | 5.529399  | -1.124757 |
| H | 5.092958  | 6.189513  | -1.386394 |
| B | 2.584304  | 6.267666  | -0.92799  |
| H | 2.488004  | 7.452981  | -0.992006 |
| B | 2.885808  | 5.180395  | -2.321027 |
| H | 2.944555  | 5.559102  | -3.446523 |
| B | 1.316306  | 5.172418  | -1.532457 |
| H | 0.325448  | 5.474039  | -2.116032 |
| B | 2.188225  | 3.576369  | -1.811221 |
| H | 1.777009  | 2.832187  | -2.642247 |
| B | 1.606158  | 5.337454  | 0.234117  |
| H | 0.851784  | 5.793639  | 1.033216  |
| B | 4.023263  | 3.91631   | -1.823589 |
| H | 4.758283  | 3.390323  | -2.597438 |
| F | -5.937181 | -4.381472 | 0.078783  |
| F | -4.928075 | -3.750068 | 1.891264  |
| F | -3.780297 | -4.264073 | 0.140566  |
| F | -5.33618  | -0.391396 | -3.906896 |



|   |           |           |           |
|---|-----------|-----------|-----------|
| F | -7.256667 | -1.000646 | -3.126272 |
| F | -6.584255 | 1.043758  | -2.894347 |
